# Supplementary material for: Tuning the lattice parameters and porosity of 2D imine covalent organic frameworks by chemically integrating 4-aminobenzaldehyde as a bifunctional linker
Source: Royal Society of Chemistry journal article supplement (doi:10.1039/d2cc05211c), 2022-01-01
Supplement: d2cc05211c1.pdf [file d2cc05211c1.pdf]

## Supplementary Information

### Tuning Lattice and Porosities of 2D Imine Covalent Organic Frameworks by Chemically Integrating 4-Aminobenzaldehyde as Bifunctional Linker

Qing Sun,<sup>1,2</sup> Hongyun Niu,<sup>2</sup> Yali Shi,<sup>1,2</sup> Yongliang Yang,<sup>2,4</sup> Yaqi Cai<sup>1,2,3,4,\*</sup>

<sup>1</sup>School of Environment, Hangzhou Institute for Advanced Study, University of Chinese Academy of Sciences, Hangzhou 310024, China

<sup>2</sup>State Key Laboratory of Environmental Chemistry and Ecotoxicology, Research Center for Eco-Environmental Sciences, Chinese Academy of Sciences, Beijing 100085, China

<sup>3</sup>Hubei Key Laboratory of Environmental and Health Effects of Persistent Toxic Substances, School of Environment and Health, Jiangnan University, Wuhan 430056, China

<sup>4</sup>University of Chinese Academy of Sciences, Beijing 100049, China

\*Correspondence: caiyaqi@rcees.ac.cn (Y. Cai).

#### Table of Contents

|                                                                                         |    |
|-----------------------------------------------------------------------------------------|----|
| Section S1 General Information.....                                                     | 2  |
| Section S2 Synthetic Procedures.....                                                    | 3  |
| Section S3 Powder X-ray diffraction analysis .....                                      | 5  |
| Section S4 Structure modeling.....                                                      | 9  |
| Section S5 N <sub>2</sub> isotherm, BET surface area, and pore width distribution ..... | 15 |
| Section S6 Nuclear magnetic resonance (NMR) spectra .....                               | 18 |
| Section S7 Fourier-transform infrared (FTIR) spectra.....                               | 20 |
| Section S8 Thermogravimetric analysis (TGA).....                                        | 22 |
| Section S9 X-ray photoelectron spectroscopy (XPS) analysis.....                         | 24 |
| Section S10 Conformation of Tp-ABA-Pa-1 .....                                           | 25 |
| Section S11 Atomic coordinates of COFs.....                                             | 28 |
| Section S12 References.....                                                             | 32 |

## Section S1 General Information

### 1.1 Chemicals and reagents

All reagents were purchased from commercial sources and used without further purification.

1,3,5-triformylphloroglucinol (Tp), 1,3,5-Tris(4-aminophenyl)benzene (TAPB), 1,3,5-tris(4-aminophenyl)triazine (TAPT) were obtained from Jilin Chinese Academy of Sciences - Yanshen Technology Co., Ltd. (Jilin, China). 1,4-phenylenediamine (Pa-1), anhydrous 1,4-dioxane and mesitylene were purchased from J&K Scientific Ltd. (Beijing, China). 2,5-dimethyl-p-phenylenediamine (Pa-2), 4-aminobenzaldehyde (ABA) were acquired from Shanghai Aladdin Biochemical Technology Co., Ltd. (Shanghai, China).

### 1.2 Characterization

Powder X-ray diffraction (PXRD) data were collected from a Bruker D8-ADVANCE diffractometer (Bruker, Germany) using a Cu K $\alpha$  ( $\lambda = 1.5418 \text{ \AA}$ ) radiation ranging from 2° to 30° with a resolution of 0.02°.

Fourier transform infrared (FTIR) spectra in the 4000–400 cm<sup>-1</sup> region was recorded on a Nicolet iS10 FTIR spectrometer (Thermo Fisher Scientific, Waltham, MA).

Solid-state nuclear magnetic resonance (ssNMR) spectra were obtained on a 600 MHz Bruker Avance III spectrometer (Bruker, Germany).

Surface analysis by X-ray photoelectron spectroscopy (XPS) was carried out using Thermo Fisher ESCALAB 250Xi equipment (Waltham, MA), and the X-ray source was Al K $\alpha$  radiation (1486.6 eV, monochromatic).

Elemental analysis (EA) was conducted on an Vario EL cube elemental analyzer (Elementar, Germany).

Surface area and pore volume were measured by Brunauer-Emmett-Teller (BET) methods (ASAP2460; Micromeritics, Norcross, GA).

Thermogravimetric analysis (TGA) curves were recorded on a TGA/DSC 3+ thermal analysis system under N<sub>2</sub>-flow (METTLER TOLEDO, Swiss).

## Section S2 Synthetic Procedures

**COF TpPa-1 and TpPa-2:** Following a modified procedure<sup>[1]</sup>, a quartz tube measuring 10 × 8 mm (o.d. × i.d.) was charged with 1,3,5-triformylphloroglucinol (Tp) (63 mg, 0.3 mmol), 1,4-phenylenediamine (Pa-1) (48 mg, 0.45 mmol) or 2,5-dimethyl-p-phenylenediamine (Pa-2) (61 mg, 0.45 mmol), 1 mL of dioxane, 2 mL of mesitylene, and 0.5 mL of 3 M aqueous acetic acid. The tube was flash frozen at 77 K in liquid N<sub>2</sub> bath, degassed by three freeze-pump-thaw cycles, and flame sealed. The reaction was heated at 120 °C for 72 h yielding a red precipitate at the bottom of the tube. The powder was isolated by centrifugation and washed with acetone (25 mL×3), and dried at room temperature and evacuated under vacuum at 100 °C, 12 h to afford a red powder.

**COF Tp-TAPT and Tp-TAPB:** A quartz tube measuring 10 × 8 mm (o.d. × i.d.) was charged with 1,3,5-triformylphloroglucinol (Tp) (42 mg, 0.2 mmol), 2,4,6-Tris(4-aminophenyl)-1,3,5-triazine (TAPT) (71 mg, 0.2 mmol) or 1,3,5-Tris(4-aminophenyl)benzene (TAPB) (70 mg, 0.2 mmol), 1 mL of dioxane, 2 mL of mesitylene, and 0.5 mL of 3 M aqueous acetic acid. The tube was flash frozen at 77 K in liquid N<sub>2</sub> bath, degassed by three freeze-pump-thaw cycles, and flame sealed. The reaction was heated at 120 °C for 72 h yielding a yellowish-brown precipitate at the bottom of the tube. The powder was isolated by centrifugation and washed with acetone (25 mL×3), and dried at room temperature and evacuated under vacuum at 100 °C, 12 h to afford an orange powder.

**COF Tp-ABA<sub>x</sub>-Pa-1 and Tp-ABA<sub>x</sub>-Pa-2:** Following the procedure for COF TpPa-1 and TpPa-2 except a certain amount of 4-aminobenzaldehyde (ABA) were added after Tp (The exact amount to be added can be found in Table S1). The powder was isolated by centrifugation and washed with acetone (25 mL×3), and dried at room temperature and evacuated under vacuum at 100 °C, 12 h to afford a red powder.

**COF Tp-ABA<sub>x</sub>-TAPT and Tp-ABA<sub>x</sub>-TAPB:** Following the procedure for COF Tp-TAPT and Tp-TAPB except a certain amount of 4-aminobenzaldehyde (ABA) were added after Tp (The exact amount to be added can be found in Table S1). The powder was isolated by centrifugation and washed with acetone (25 mL×2), chloroform (15 mL×2) and hexanes (15 mL×1), and dried at room temperature and evacuated under vacuum at 100 °C, 12 h to afford an orange or yellow powder.

**Table S1.** Amounts of monomers used to synthesize COFs.

| COF                           |        | Tp<br>(mg) | ABA<br>(mg) | Amine<br>(mg) | Product<br>(mg) | Yield<br>(%) |
|-------------------------------|--------|------------|-------------|---------------|-----------------|--------------|
| TpPa-1                        |        | 63.0       | 0           | 48.7          | 97.4            | 87.2         |
| Tp-ABA <sub>x</sub> -<br>Pa-1 | x=0.2  |            | 10.9        |               | 104.4           | 85.2         |
|                               | x=0.4  |            | 21.8        |               | 114.8           | 86.0         |
|                               | x=0.6  |            | 32.7        |               | 107.5           | 74.4         |
|                               | x=0.8  |            | 43.6        |               | 118.2           | 76.1         |
|                               | x=1    |            | 54.5        |               | 122.2           | 73.5         |
|                               | x=1.5  |            | 82.0        |               | 130.7           | 67.5         |
|                               | x=2    |            | 109.0       |               | 134.7           | 61.0         |
| TpPa-2                        |        | 63.0       | 0           | 61.2          | 105.7           | 85.1         |
| Tp-ABA <sub>x</sub> -<br>Pa-2 | x=0.25 |            | 13.6        |               | 117.6           | 85.3         |
|                               | x=0.5  |            | 27.3        |               | 128.4           | 84.8         |

|                               |        |      |       |      |       |      |
|-------------------------------|--------|------|-------|------|-------|------|
|                               | x=0.75 |      | 40.9  |      | 142.0 | 86.0 |
|                               | x=1    |      | 54.5  |      | 140.4 | 78.6 |
|                               | x=1.5  |      | 81.8  |      | 133.4 | 64.8 |
|                               | x=2    |      | 109.0 |      | 135.5 | 58.1 |
| Tp-TAPT                       |        |      | 0     |      | 102.8 | 91.1 |
| Tp-ABA <sub>x</sub> -<br>TAPT | x=0.75 | 42.0 | 18.2  | 70.8 | 110.0 | 84.0 |
|                               | x=1.5  |      | 36.3  |      | 125.3 | 84.0 |
|                               | x=2.25 |      | 54.5  |      | 138.3 | 82.7 |
|                               | x=3    |      | 72.6  |      | 137.5 | 74.2 |
|                               | x=4.5  |      | 109.0 |      | 143.8 | 64.8 |
|                               | x=6    |      | 145.3 |      | 144.3 | 55.9 |
| Tp-TAPB                       |        |      | 0     |      | 107.2 | 95.5 |
| Tp-ABA <sub>x</sub> -<br>TAPB | x=0.75 | 42.0 | 18.2  | 70.2 | 119.1 | 91.3 |
|                               | x=1.5  |      | 36.3  |      | 126.8 | 85.4 |
|                               | x=2.25 |      | 54.5  |      | 135.2 | 81.1 |
|                               | x=3    |      | 72.6  |      | 137.1 | 74.2 |
|                               | x=4.5  |      | 109.0 |      | 143.2 | 64.7 |
|                               | x=6    |      | 145.3 |      | 147.3 | 57.2 |

## Section S3 Powder X-ray diffraction analysis

Pawley refinements were performed using the Reflex module in Materials Studio. All the patterns were refined using the Pseudo-Voigt function, with all FWHM parameters (U, V, W), profile parameters (NA, NB), and line shift allowed to vary. Lattice parameter were also refined.

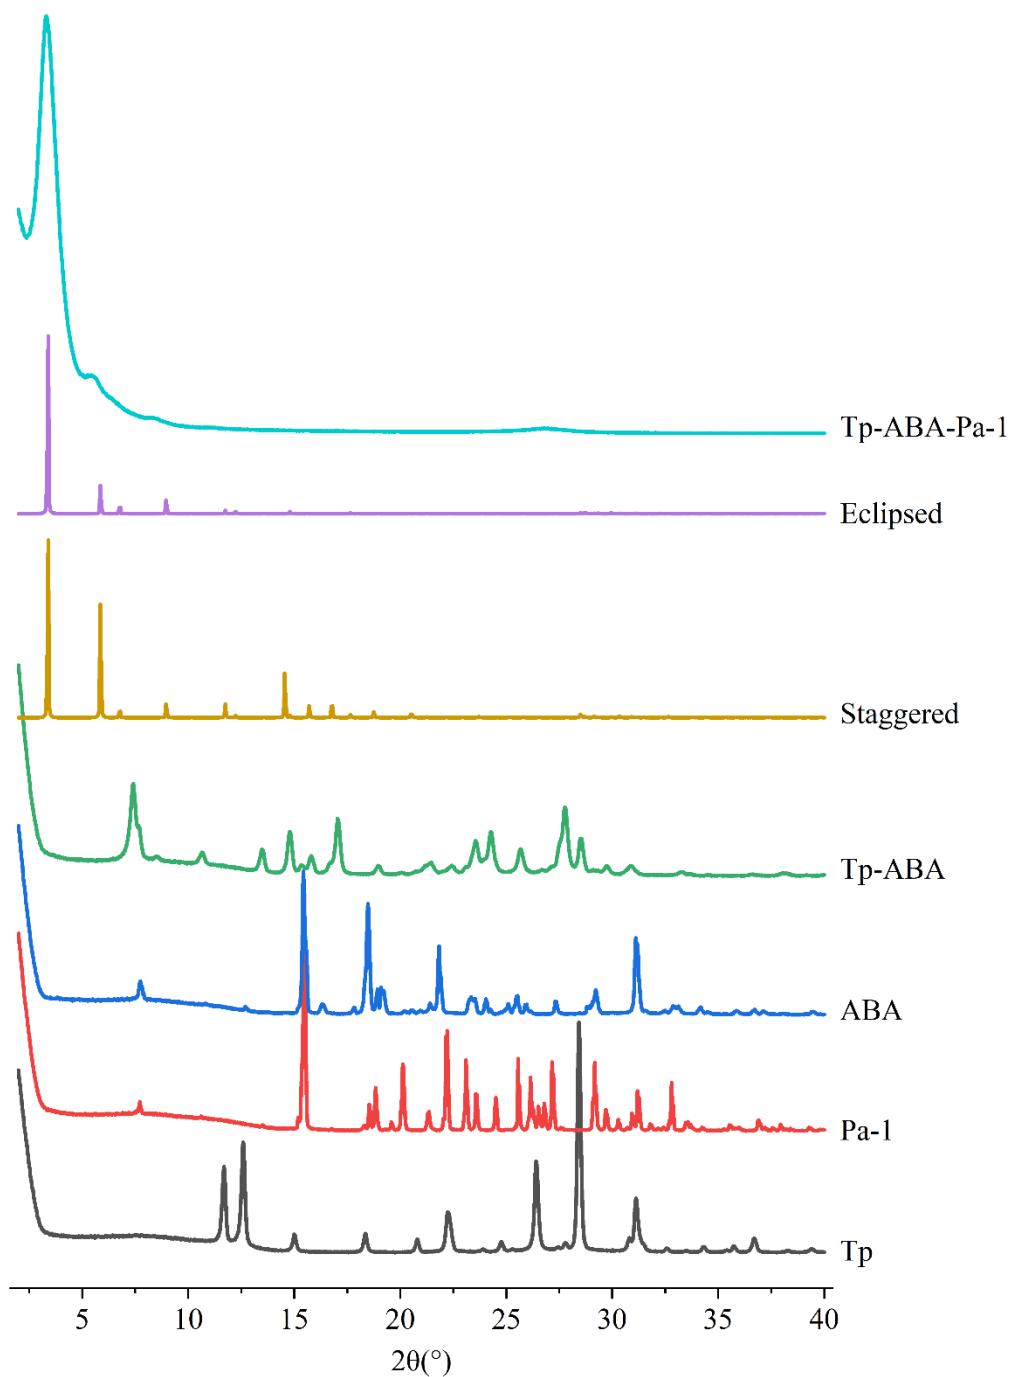

**Figure S1.** Stacked PXRD spectra of Monomers, product of Tp react with ABA, and simulated PXRD patterns compared with the experimental spectra of Tp-ABA-Pa-1 COF.

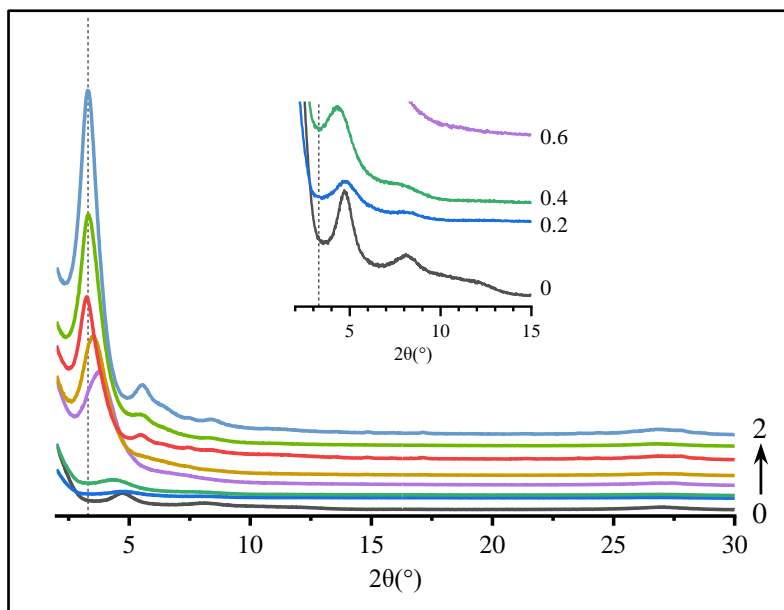

**Figure S2.** The original PXRD patterns of Tp-ABA<sub>x</sub>-Pa-1 COFs.

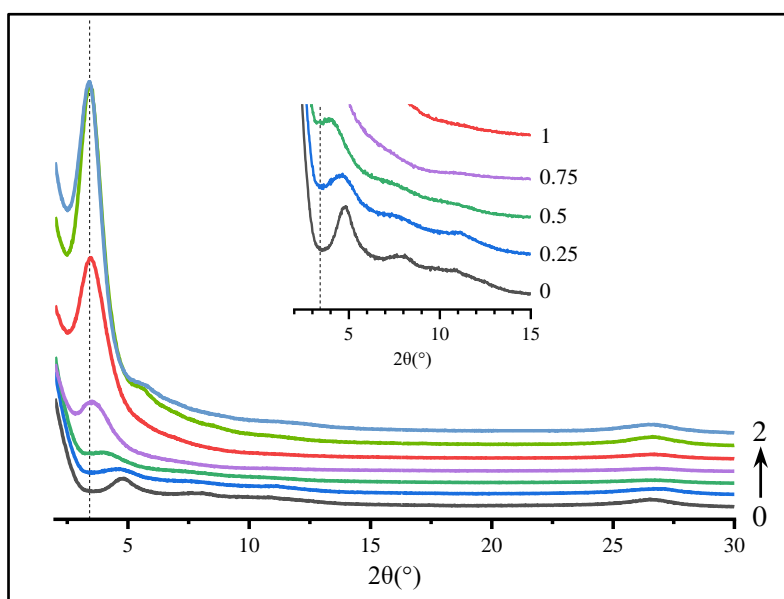

**Figure S3.** The original PXRD patterns of Tp-ABA<sub>x</sub>-Pa-2 COFs.

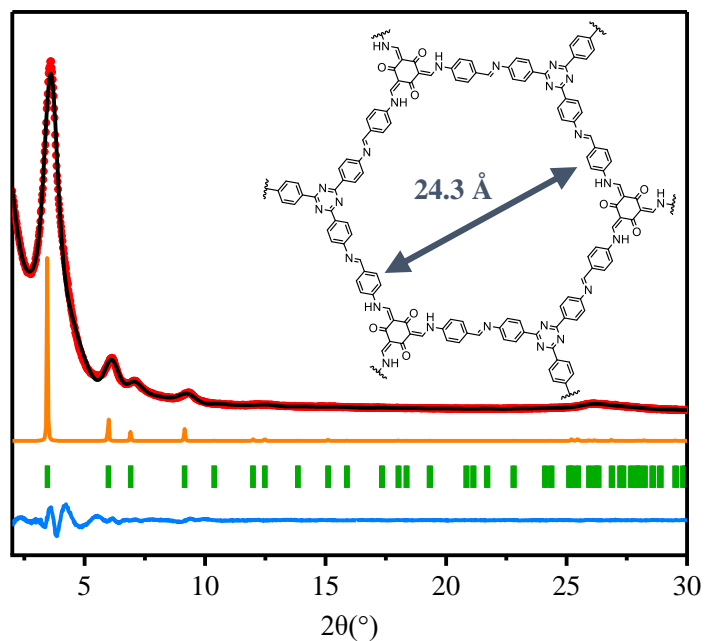

**Figure S4.** PXRD patterns of Tp-ABA-TAPT COF (red pots: experimentally observed, black: Pawley refinement, blue: their difference, orange: simulated with eclipsed mode, green: Bragg position.)

$R_p = 3.10\%$ ,  $R_{wp} = 4.27\%$ .

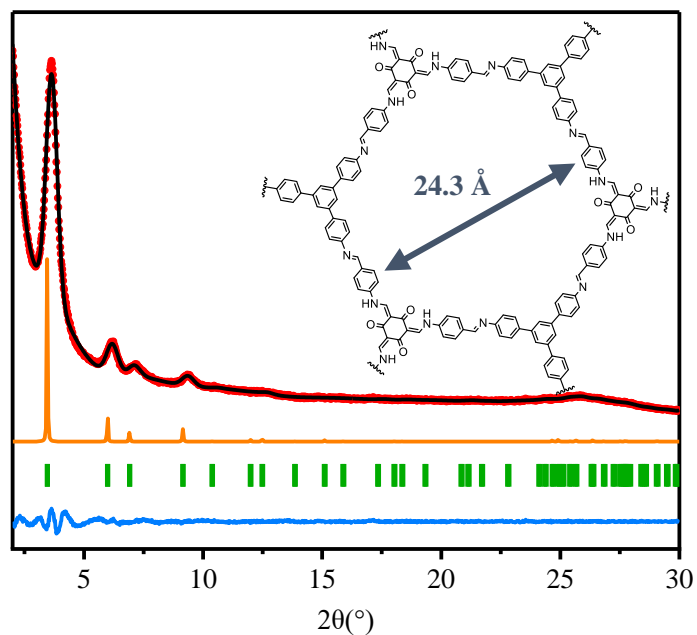

**Figure S5.** PXRD patterns of Tp-ABA-TAPB COF (red pots: experimentally observed, black: Pawley refinement, blue: their difference, orange: simulated with eclipsed mode, green: Bragg position.)

$R_p = 2.05$ ,  $R_{wp} = 2.61\%$ .

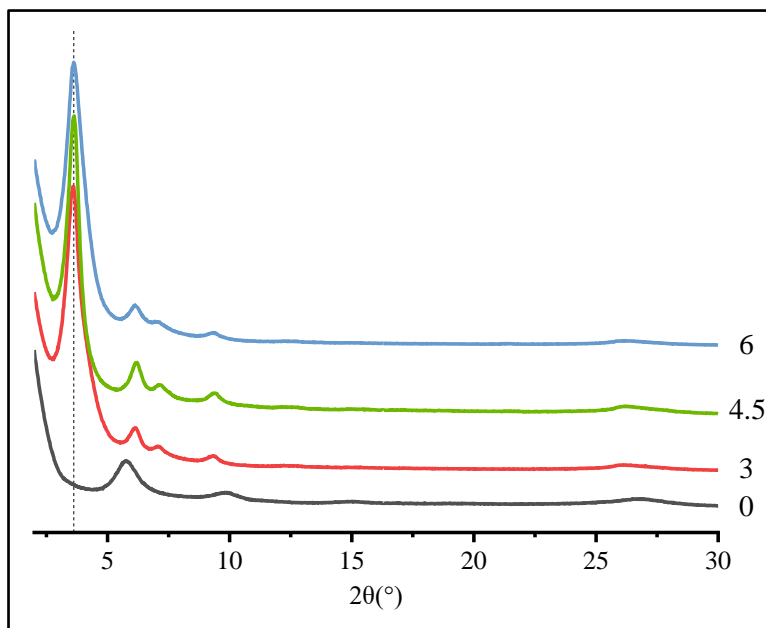

**Figure S6.** The original PXRD patterns of Tp-ABA<sub>x</sub>-TAPT COFs.

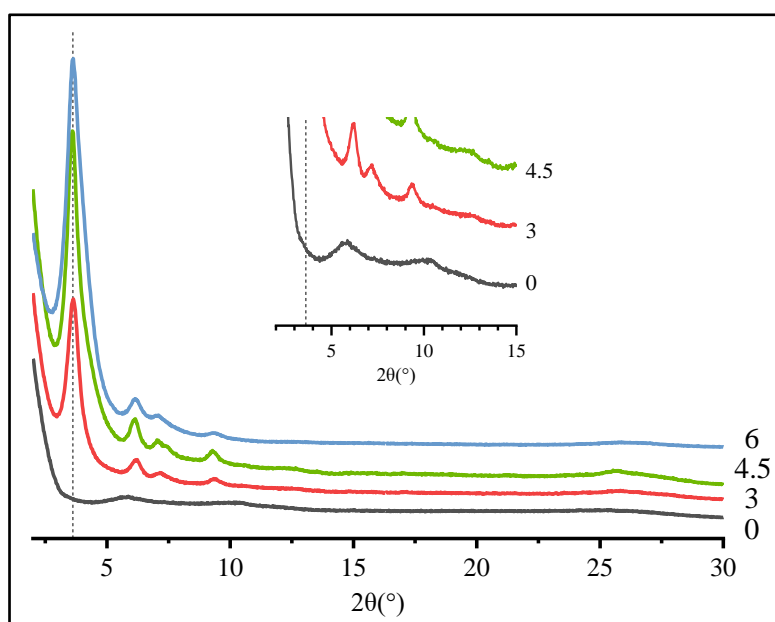

**Figure S7.** The original PXRD patterns of Tp-ABA<sub>x</sub>-TAPB COFs.



## Section S4 Structure modeling

Structural models of COFs were generated using the Accelrys Materials Studio 7.0 software package. The proposed model was geometry optimized using the Forcite Module (Universal force fields, Ewald summations) to obtain the optimized lattice parameters.

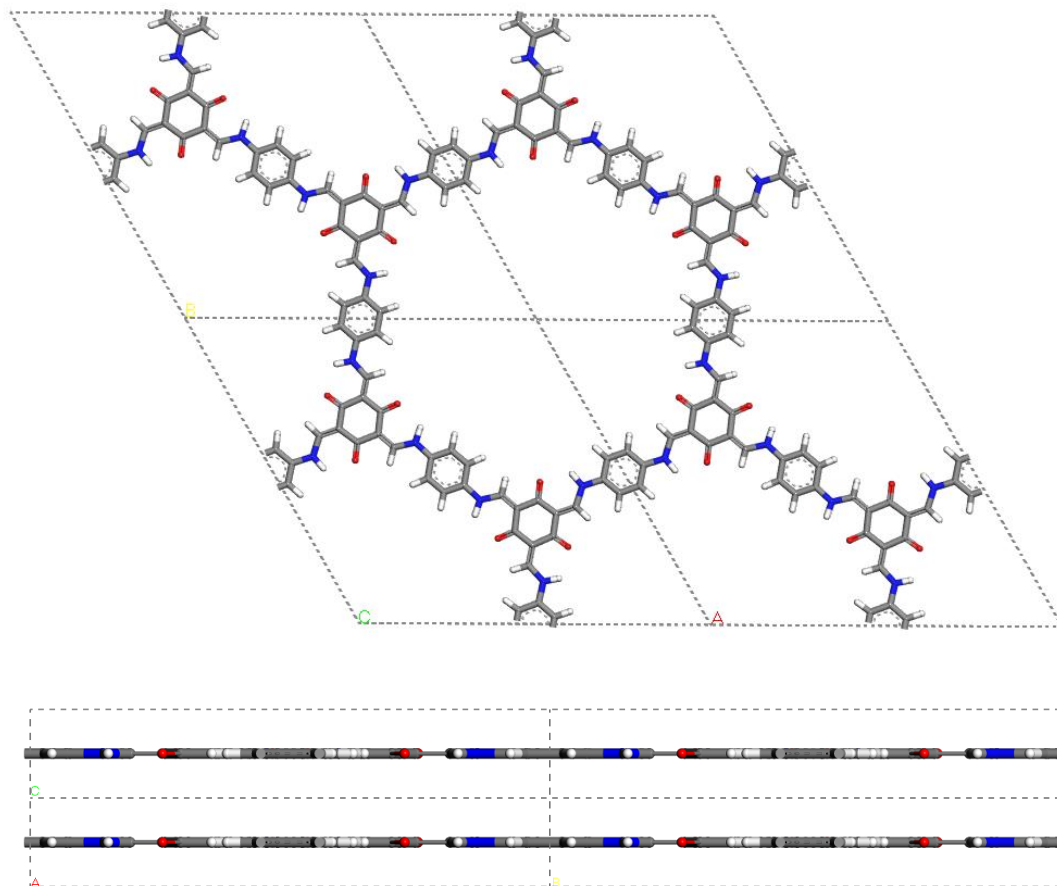

**Figure S8.**  $2 \times 2 \times 2$  cells of TpPa-1 COF from Materials Studio.

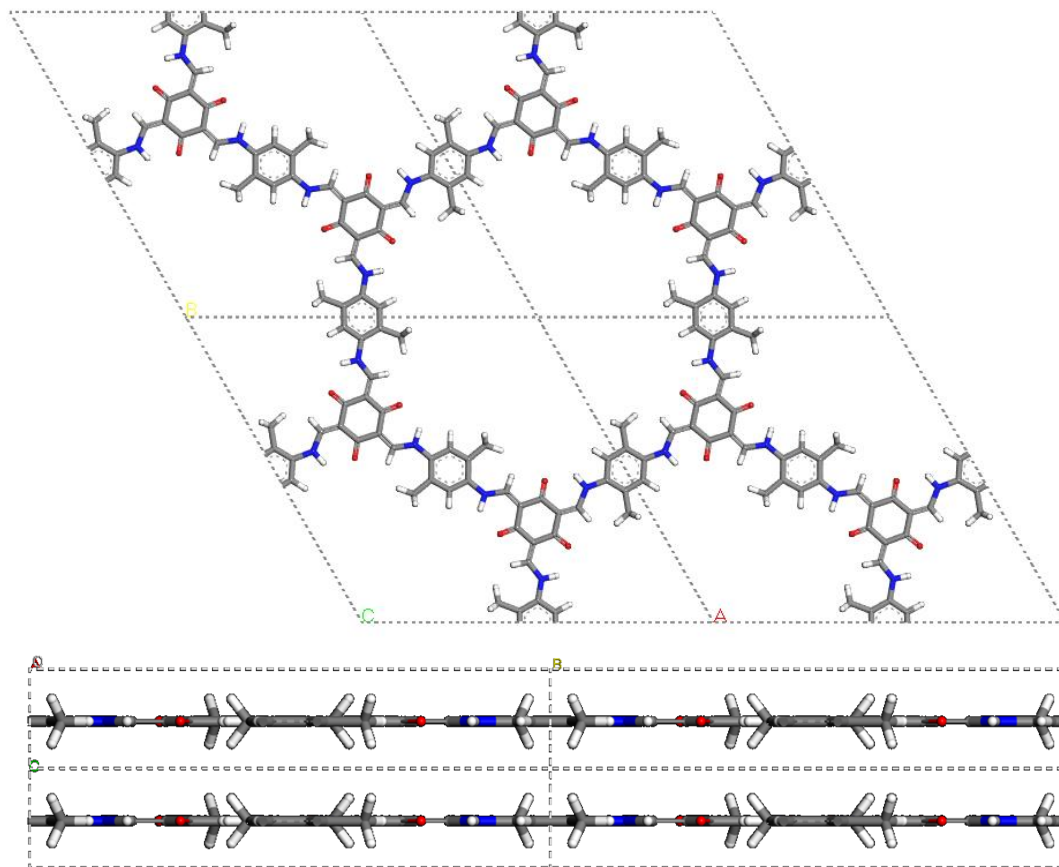

**Figure S9.** 2×2×2 cells of TpPa-2 COF from Materials Studio.

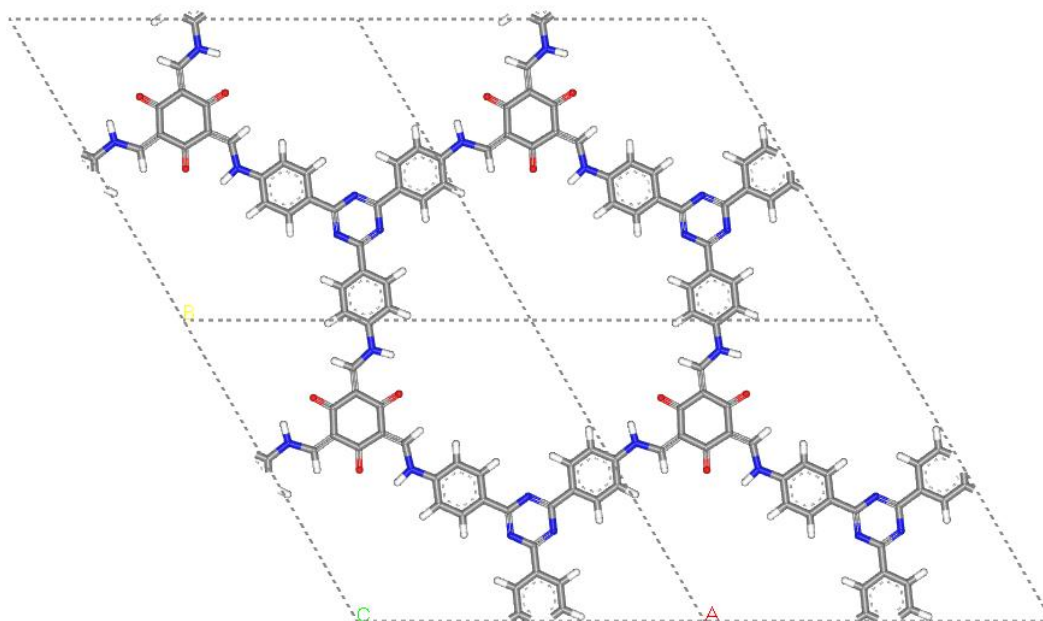

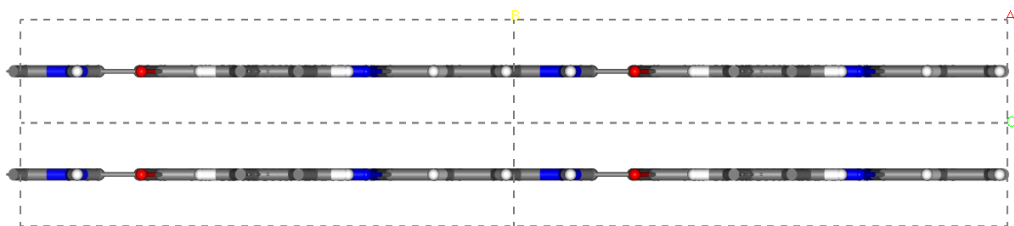

**Figure S10.**  $2 \times 2 \times 2$  cells of Tp-TAPT COF from Materials Studio.

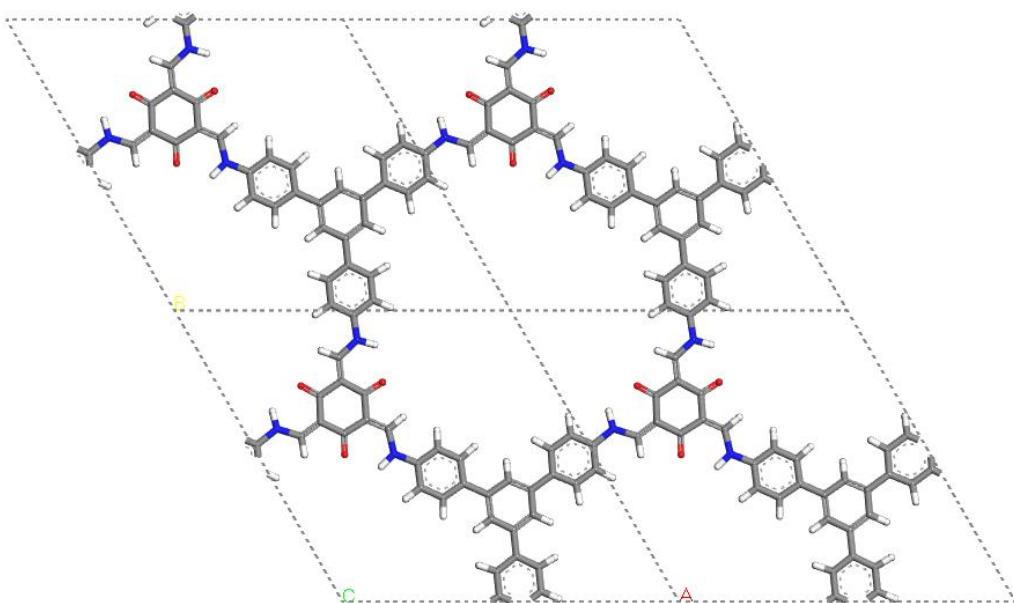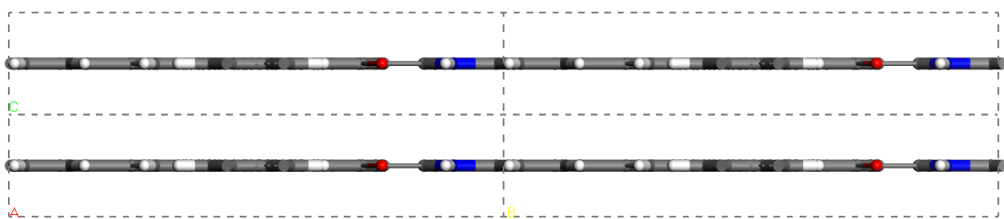

**Figure S11.**  $2 \times 2 \times 2$  cells of Tp-TAPB COF from Materials Studio.

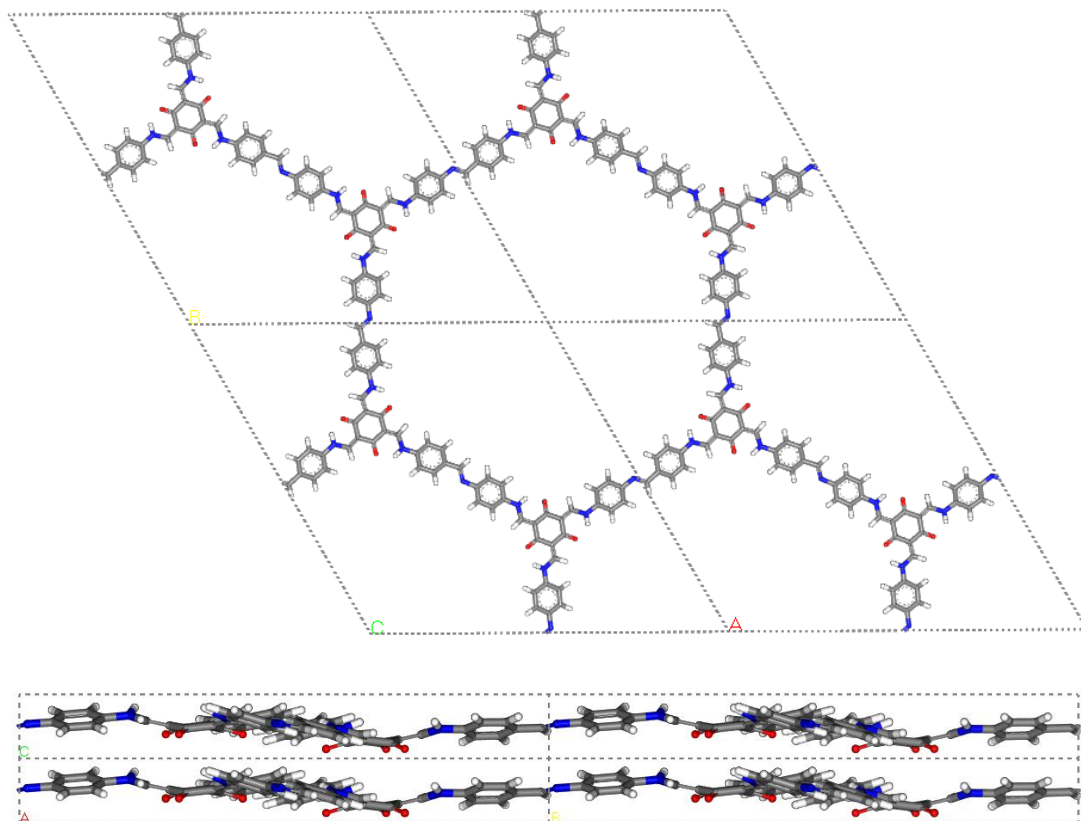

**Figure S12.** 2×2×2 cells of Tp-ABA-Pa-1 COF from Materials Studio.

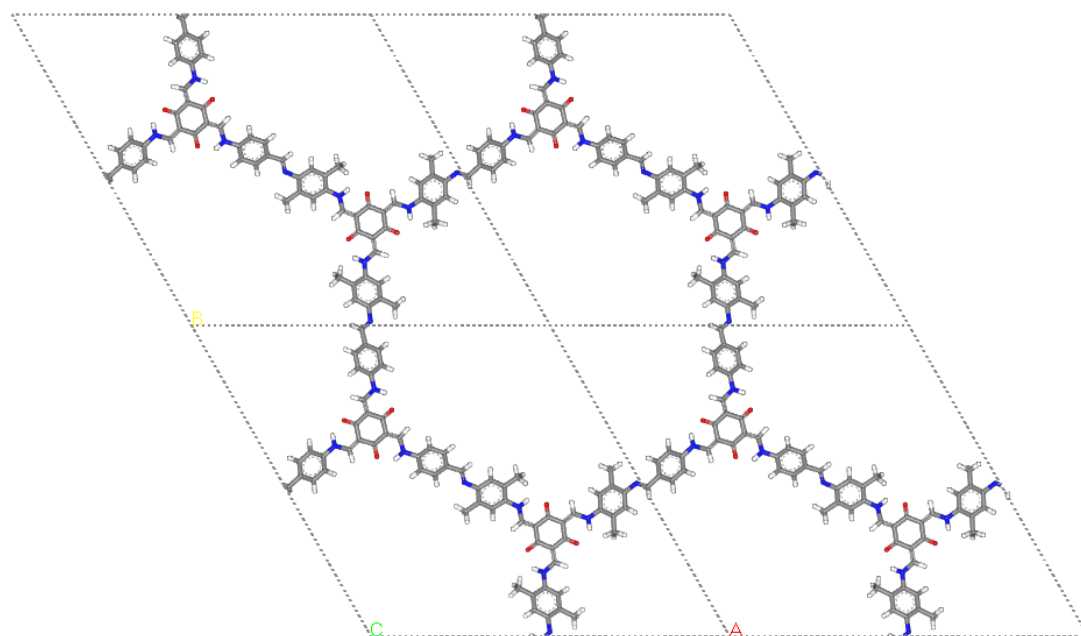

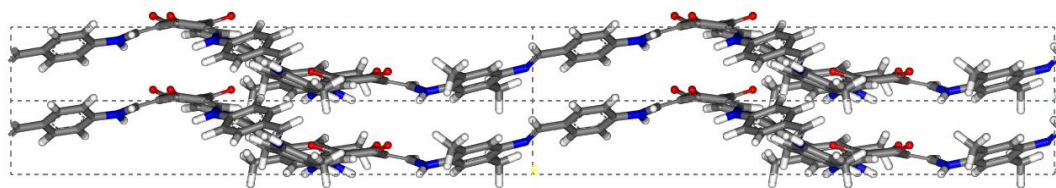

**Figure S13.**  $2 \times 2 \times 2$  cells of Tp-ABA-Pa-2 COF from Materials Studio.

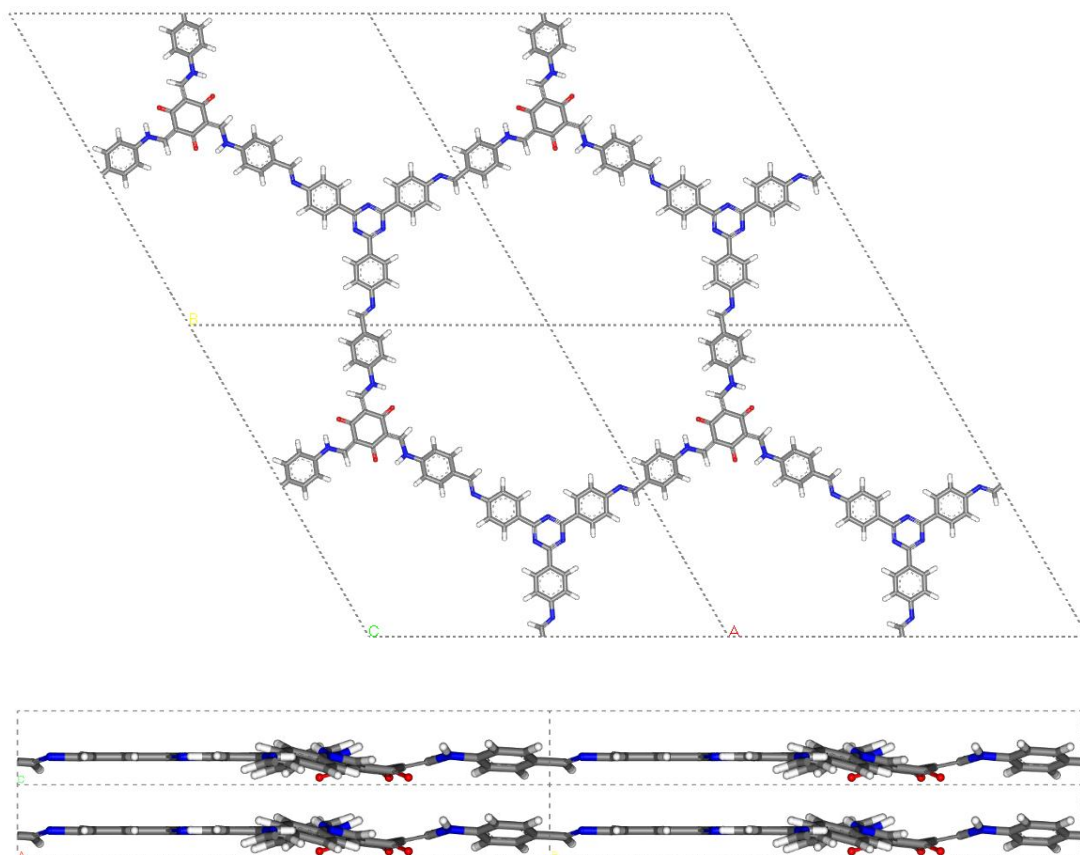

**Figure S14.**  $2 \times 2 \times 2$  cells of Tp-ABA-TAPT COF from Materials Studio.

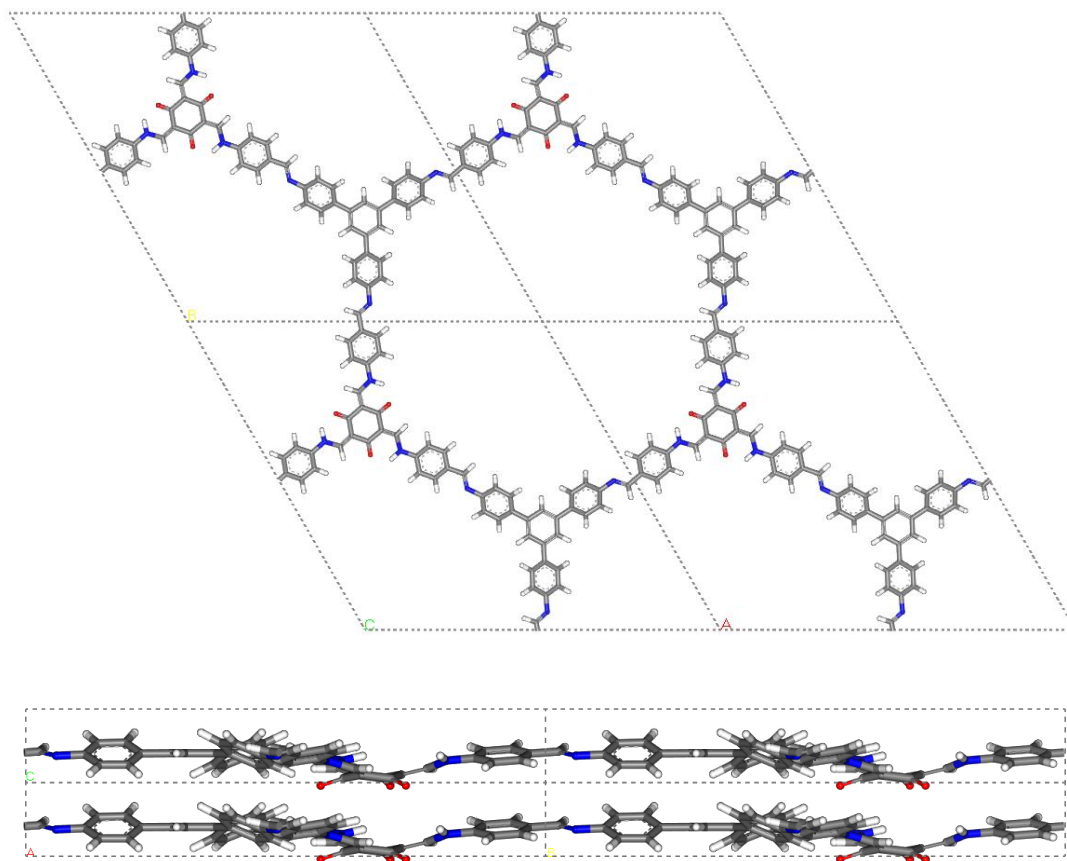

**Figure S15.** 2x2x2 cells of Tp-ABA-TAPB COF from Materials Studio.

## Section S5 N<sub>2</sub> isotherm, BET surface area, and pore width distribution

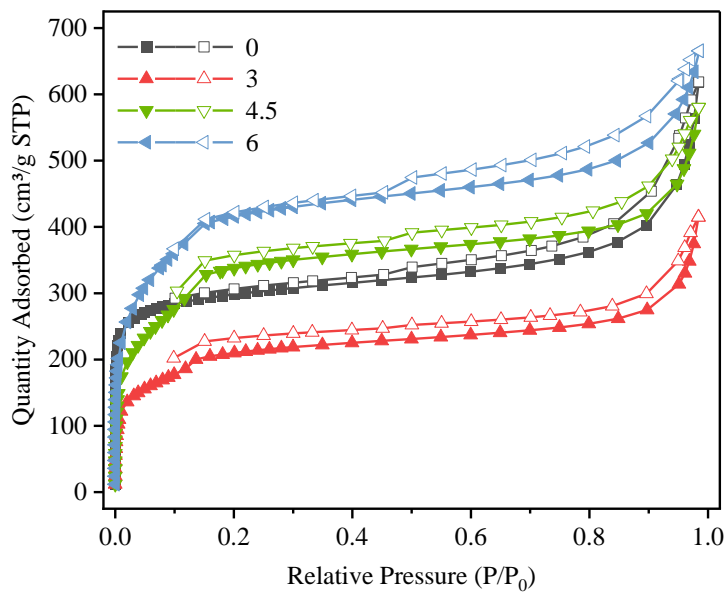

**Figure S16.** N<sub>2</sub> adsorption (filled symbols) and desorption (empty symbols) isotherms of Tp-ABA<sub>x</sub>-TAPT COFs.

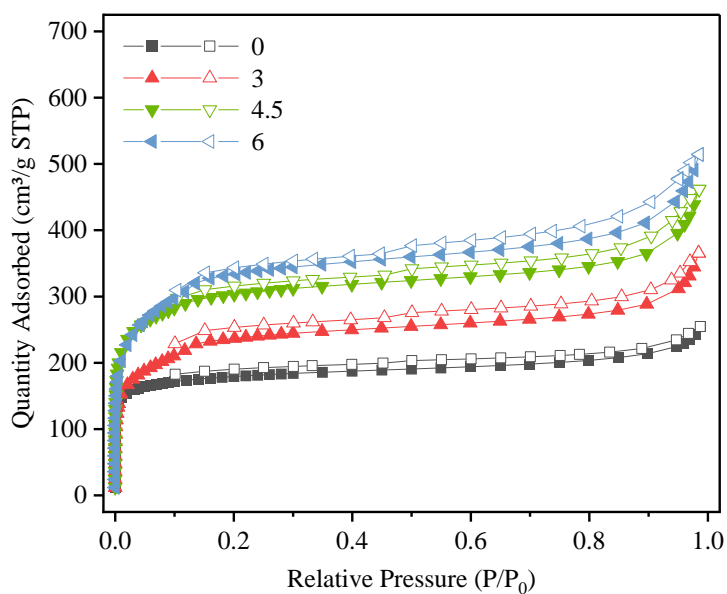

**Figure S17.** N<sub>2</sub> adsorption (filled symbols) and desorption (empty symbols) isotherms of Tp-ABA<sub>x</sub>-TAPB COFs.

**Table S2.** BET surface area values of Tp-ABA series COFs.

| Tp-ABA <sub>x</sub> -Pa-1 |                                  | Tp-ABA <sub>x</sub> -Pa-2 |                                  | Tp-ABA <sub>x</sub> -TAPT |                                  | Tp-ABA <sub>x</sub> -TAPB |                                  |
|---------------------------|----------------------------------|---------------------------|----------------------------------|---------------------------|----------------------------------|---------------------------|----------------------------------|
| Mole ratio of ABA/Pa-1    | surface area (m <sup>2</sup> /g) | Mole ratio of ABA/Pa-2    | surface area (m <sup>2</sup> /g) | Mole ratio of ABA/TAPT    | surface area (m <sup>2</sup> /g) | Mole ratio of ABA/TAPB    | surface area (m <sup>2</sup> /g) |
| 0                         | 592                              | 0                         | 230                              | 0                         | 1126                             | 0                         | 681                              |
| 0.2                       | 877                              | 0.25                      | 700                              | 3                         | 728                              | 3                         | 857                              |
| 0.4                       | 993                              | 0.5                       | 838                              | 4.5                       | 1137                             | 4.5                       | 1133                             |
| 0.6                       | 1138                             | 0.75                      | 989                              | 6                         | 1513                             | 6                         | 1213                             |
| 0.8                       | 1521                             | 1                         | 1352                             |                           |                                  |                           |                                  |
| 1                         | 1526                             | 1.5                       | 1488                             |                           |                                  |                           |                                  |
| 1.5                       | 1770                             | 2                         | 1297                             |                           |                                  |                           |                                  |
| 2                         | 1846                             |                           |                                  |                           |                                  |                           |                                  |

**Table S3.** The observed and predicted BET surface areas of Tp- and Tp-ABA series COFs.

| COF     | Observed BET | Predicted BET | Observed/Predicted | COF         | Observed BET | Predicted BET | Observed/Predicted |
|---------|--------------|---------------|--------------------|-------------|--------------|---------------|--------------------|
| TpPa-1  | 592          | 1622          | 37%                | Tp-ABA-Pa-1 | 1846         | 2127          | 87%                |
| TpPa-2  | 230          | 1810          | 13%                | Tp-ABA-Pa-2 | 1488         | 1811          | 82%                |
| Tp-TAPT | 1126         | 1440          | 78%                | Tp-ABA-TAPT | 1513         | 2022          | 75%                |
| Tp-TAPB | 681          | 1485          | 46%                | Tp-ABA-TAPB | 1213         | 2099          | 58%                |



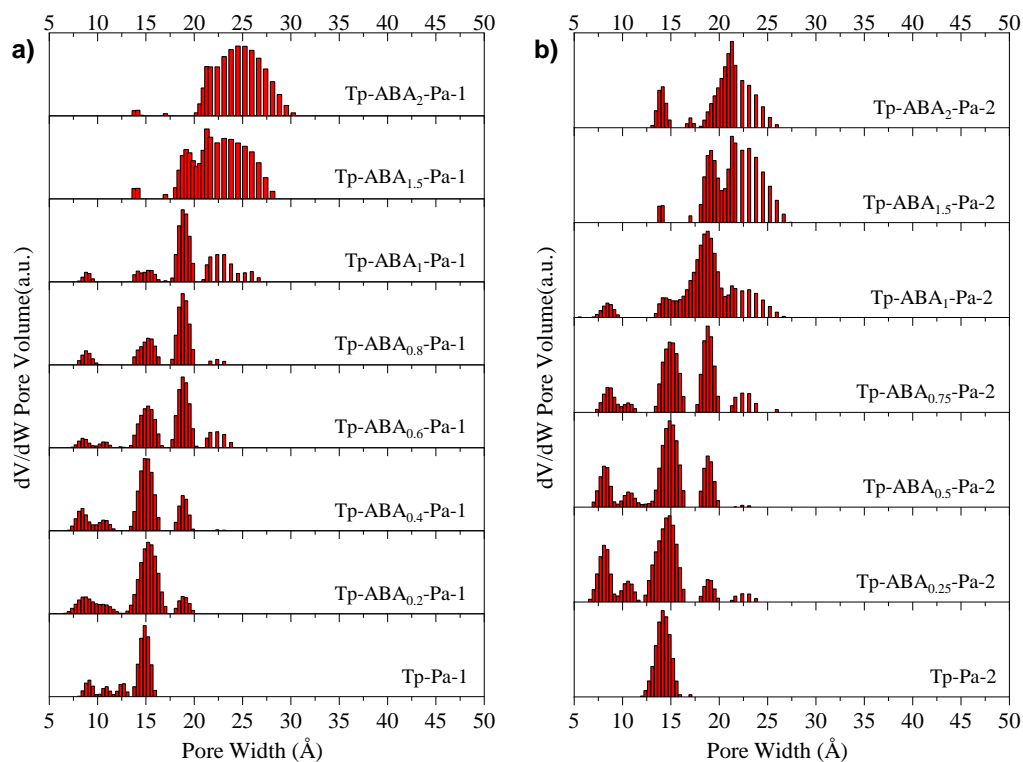

**Figure S18.** Pore width distributions of (a) Tp-ABA<sub>x</sub>-Pa-1 COFs and (b) Tp-ABA<sub>x</sub>-Pa-2 COFs derived from N<sub>2</sub> sorption isotherm measured at 77 K, fitted with DFT model of N<sub>2</sub> on Cylindrical Pores.

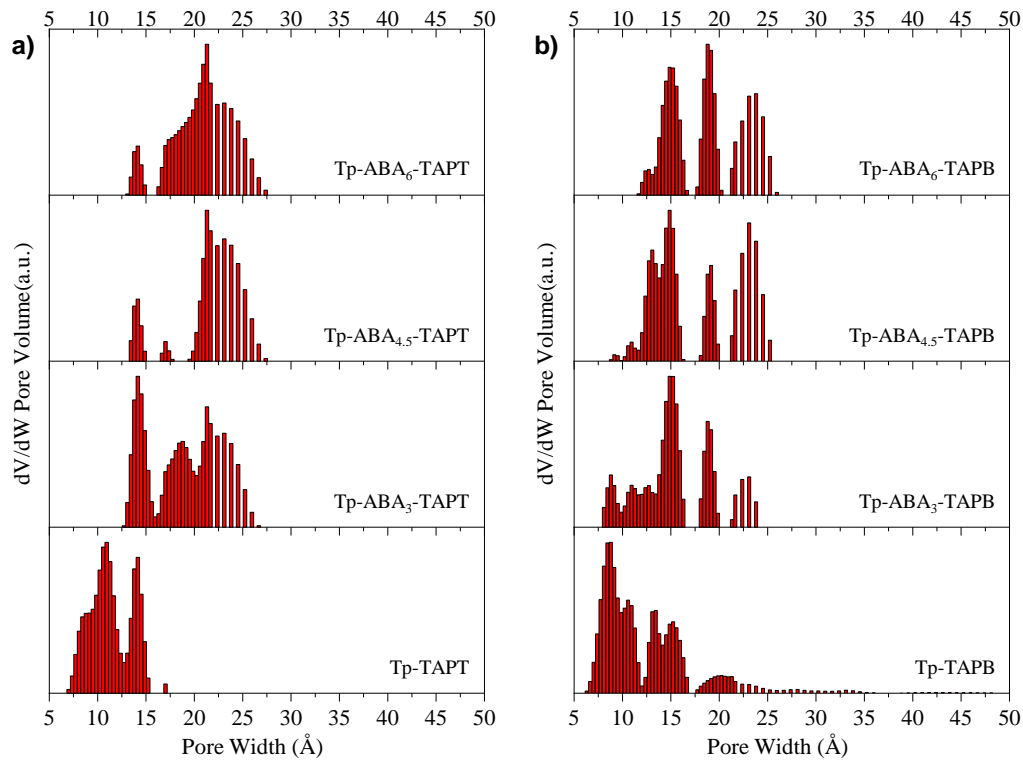

**Figure S19.** Pore width distributions of (a) Tp-ABA<sub>x</sub>-TAPT COFs and (b) Tp-ABA<sub>x</sub>-TAPB COFs derived from N<sub>2</sub> sorption isotherm measured at 77 K, fitted with DFT model of N<sub>2</sub> on Cylindrical Pores.

## Section S6 Nuclear magnetic resonance (NMR) spectra

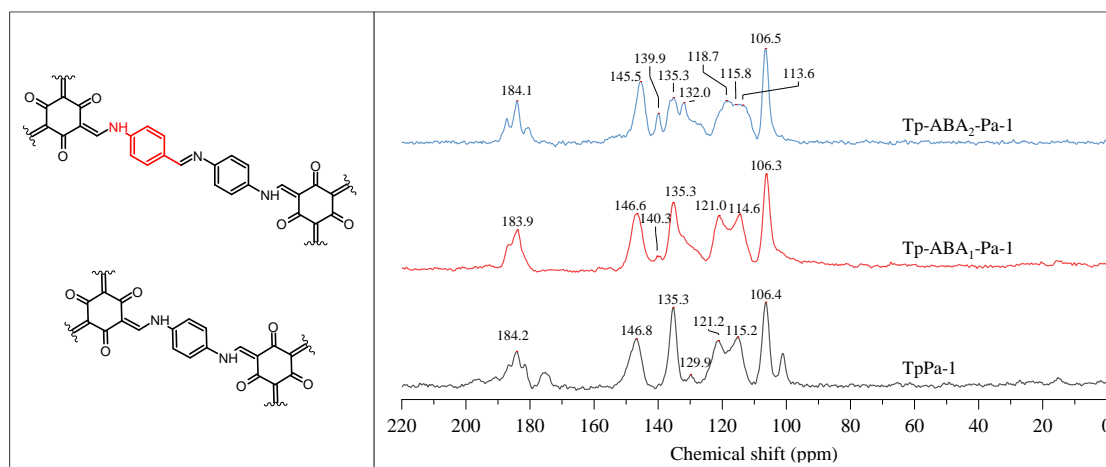

**Figure S20.**  $^{13}\text{C}$  ssNMR spectra of selected Tp-ABA<sub>x</sub>-Pa-1 COFs.

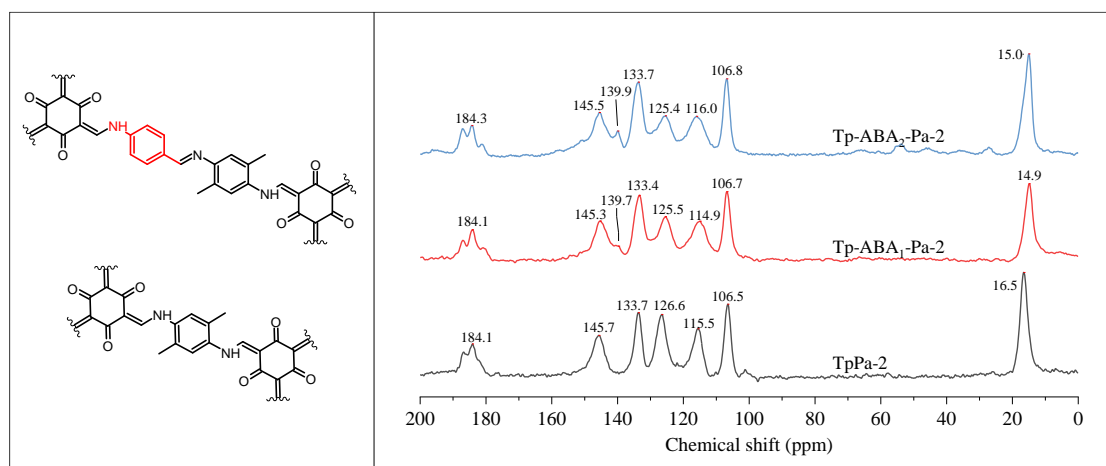

**Figure S21.**  $^{13}\text{C}$  ssNMR spectra of selected Tp-ABA<sub>x</sub>-Pa-2 COFs.

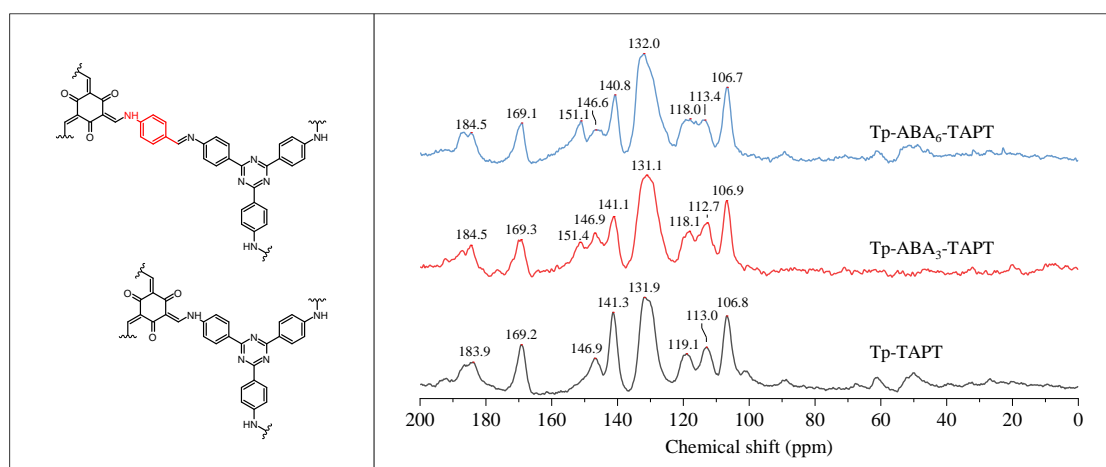

**Figure S22.**  $^{13}\text{C}$  ssNMR spectra of selected Tp-ABA<sub>x</sub>-TAPT COFs.

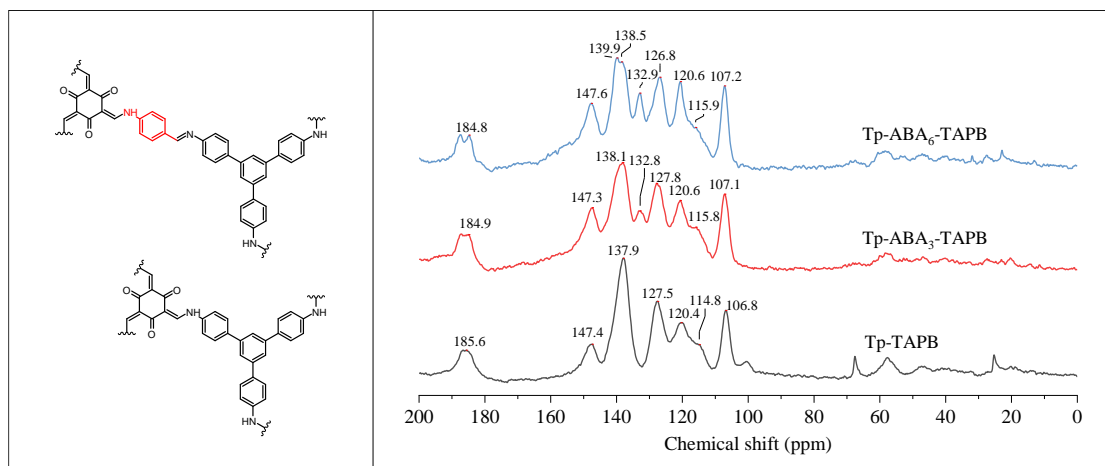

**Figure S23.**  $^{13}\text{C}$  ssNMR spectra of selected Tp-ABA<sub>x</sub>-TAPB COFs.

## Section S7 Fourier-transform infrared (FTIR) spectra

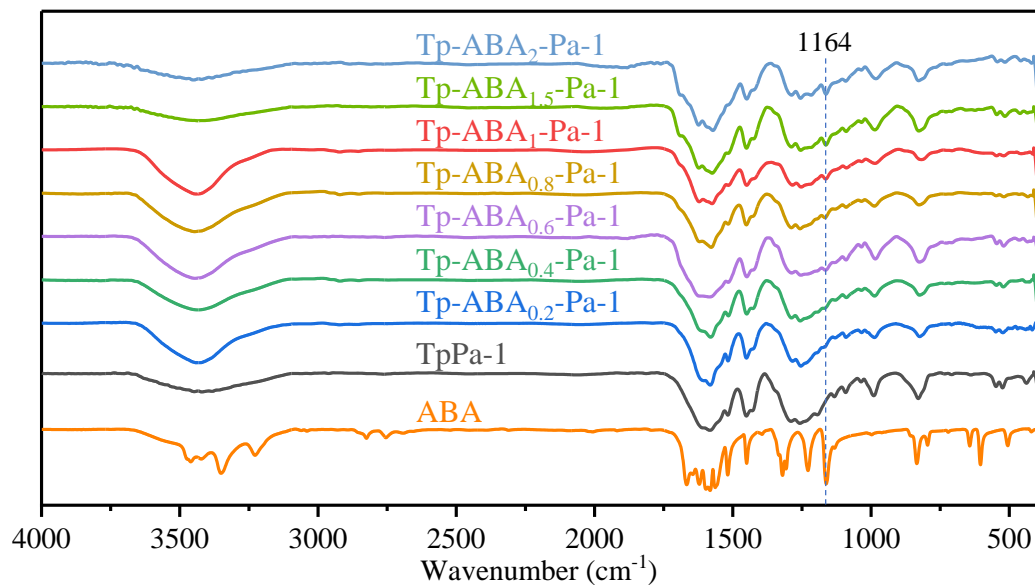

**Figure S24.** FTIR spectra of ABA and Tp-ABA<sub>x</sub>-Pa-1 COFs.

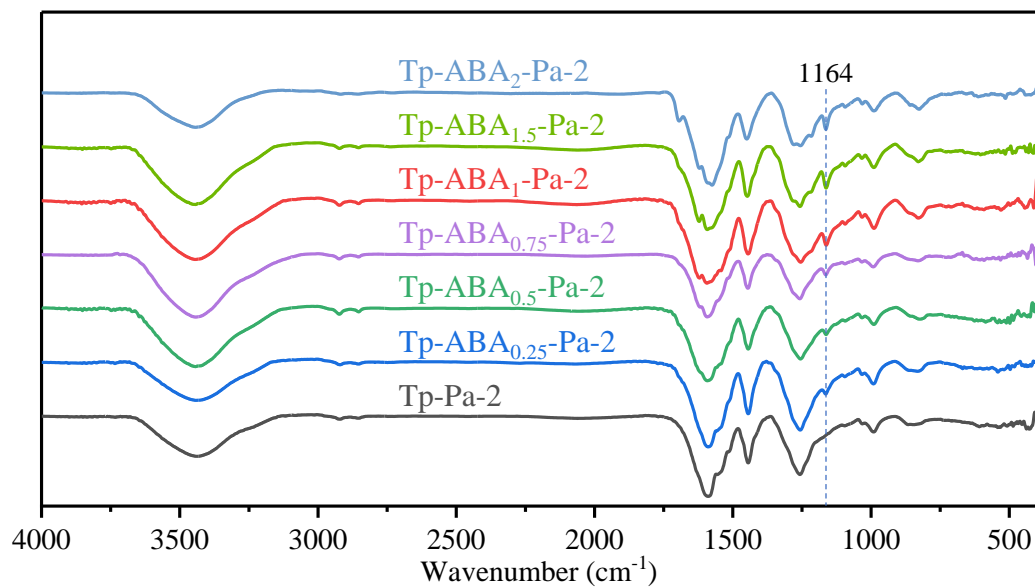

**Figure S25.** FTIR spectra of Tp-ABA<sub>x</sub>-Pa-2 COFs.

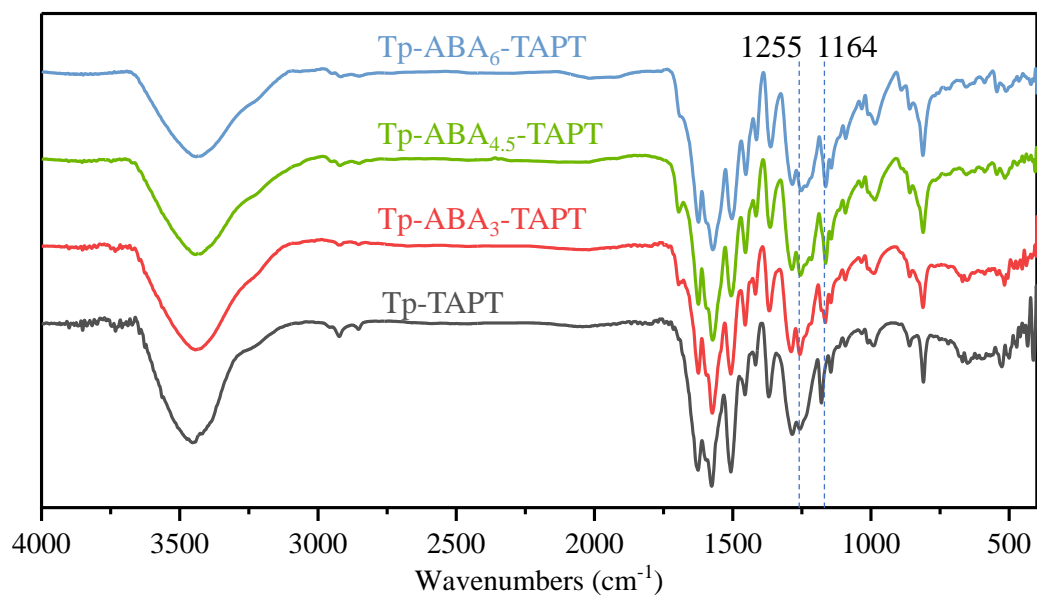

**Figure S26.** FTIR spectra of Tp-ABA<sub>x</sub>-TAPT COFs.

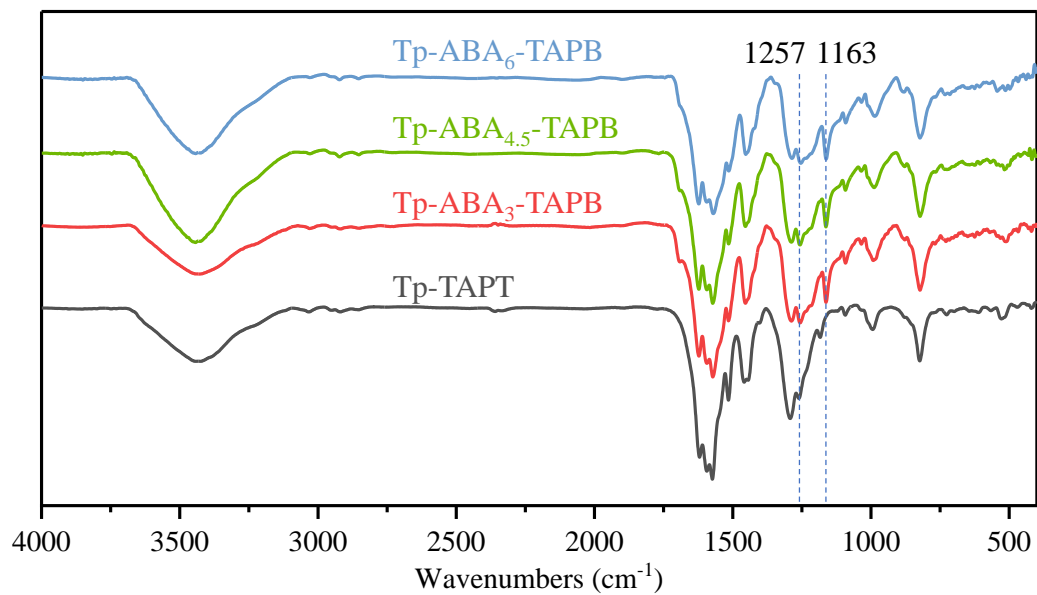

**Figure S27.** FTIR spectra of Tp-ABA<sub>x</sub>-TAPB COFs.

## Section S8 Thermogravimetric analysis (TGA)

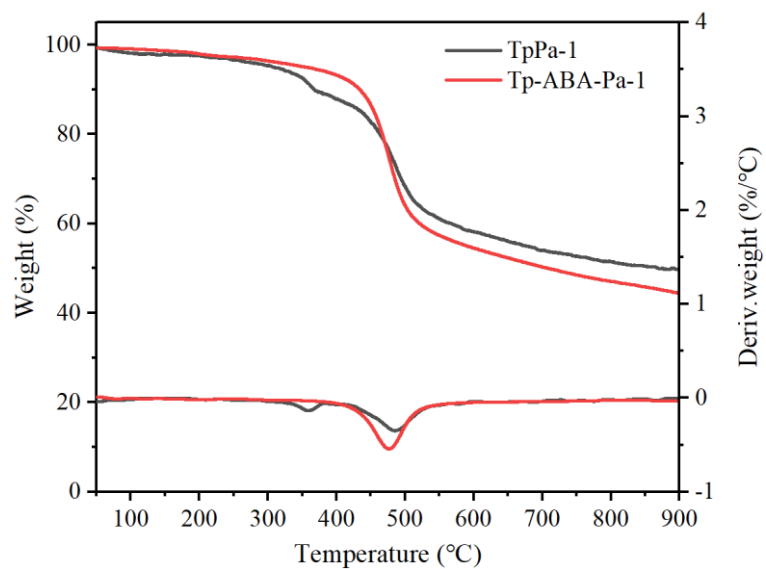

**Figure S28.** TGA data of TpPa-1 COF compare with Tp-ABA-Pa-1 COF.

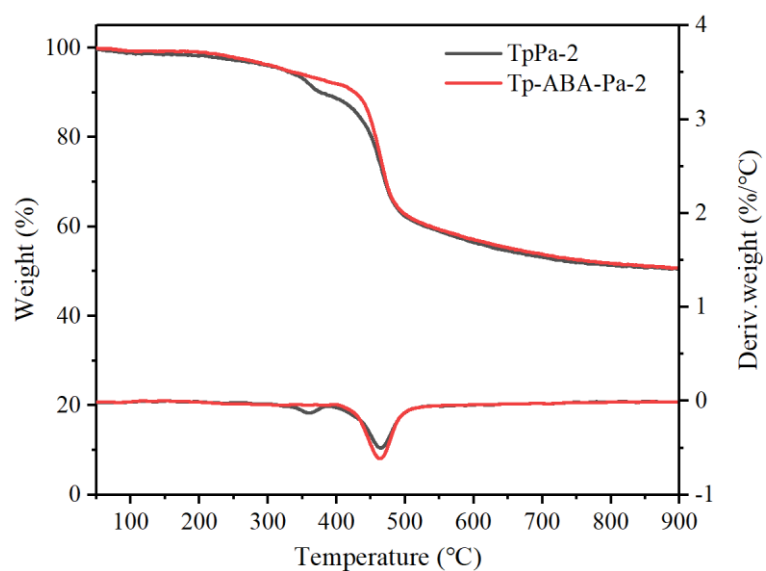

**Figure S29.** TGA data of TpPa-2 COF compare with Tp-ABA-Pa-2 COF.

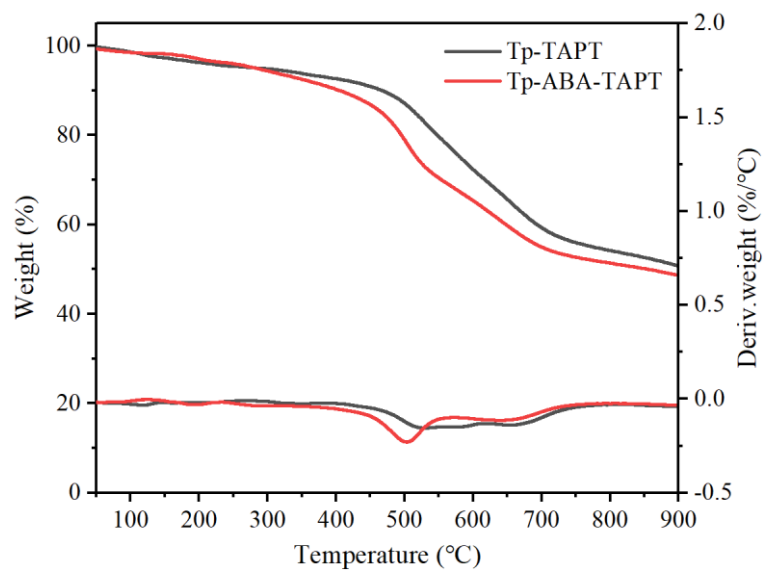

**Figure S30.** TGA data of Tp-TAPT COF compare with Tp-ABA-TAPT COF.

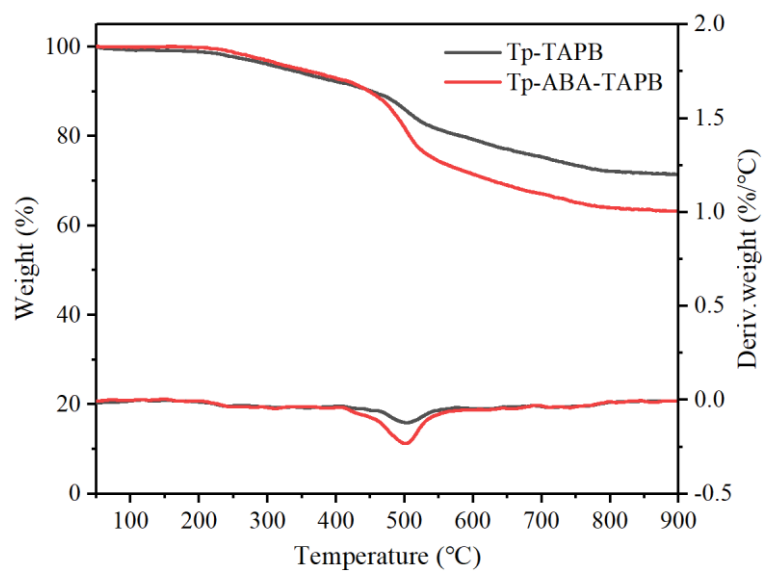

**Figure S31.** TGA data of Tp-TAPB COF compare with Tp-ABA-TAPB COF.

## Section S9 X-ray photoelectron spectroscopy (XPS) analysis

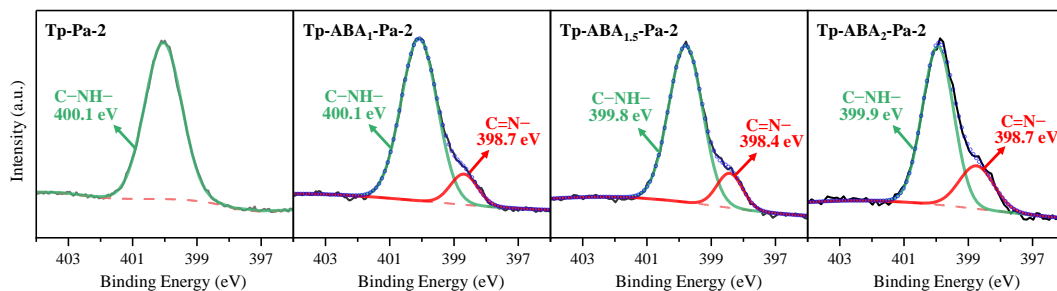

**Figure S32.** N 1s XPS spectra of selected Tp-ABA<sub>x</sub>-Pa-2 COFs.

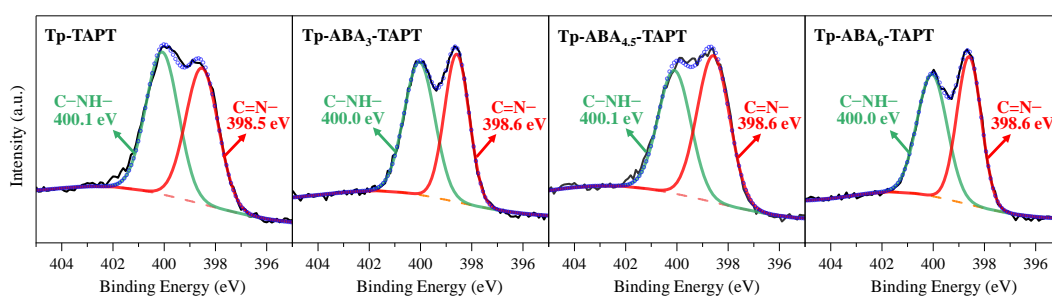

**Figure S33.** N 1s XPS spectra of Tp-ABA<sub>x</sub>-TAPT COFs.

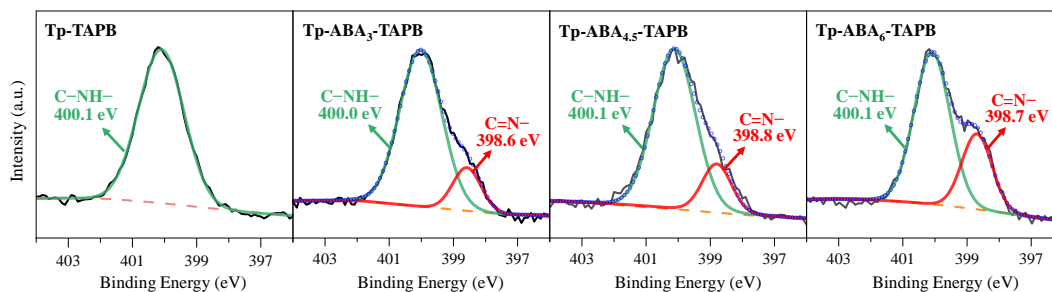

**Figure S34.** N 1s XPS spectra of Tp-ABA<sub>x</sub>-TAPB COFs.



## Section S10 Conformation of Tp-ABA-Pa-1

As the bifunctional linker ABA can react with both Tp and Pa-1, there are two potential conformations of the connecting arms between each two knots (as shown in the figure below). Therefore, the structural model of Tp-ABA-Pa-1 COF had many possibilities. We found that most potential conformations are not spatially repetitive and thus cannot be represented by a simple model. For Tp-ABA-Pa-1 COF, there are only two simple models that can be repeatedly extended in plane (Model 1 and Model 2), and the other possible conformations need to contain at least four types of cells to extend in plane. We also listed three other possible models for comparison in following figure.

In order to show the different structures of COF more clearly, we replace the connecting arms and knots with the following patterns.

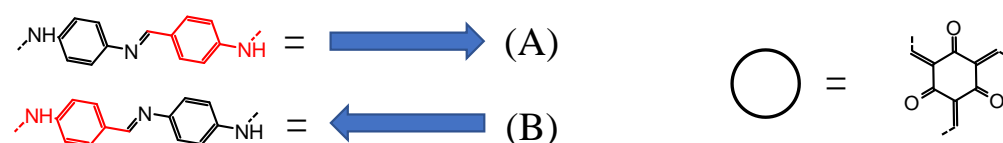

Note that the six letters in parenthesis in the following figure represent the cell type of the six connecting arms clockwise from the left when viewed from the center of the current cell.

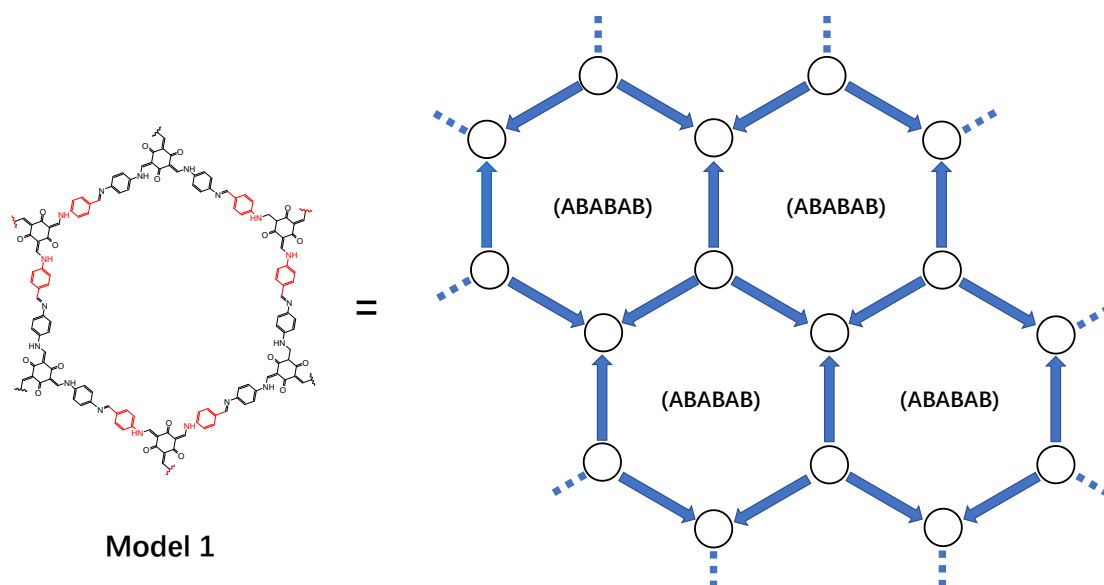

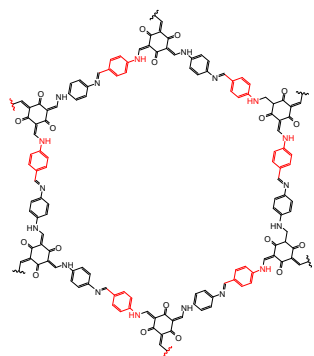

Model 2

=

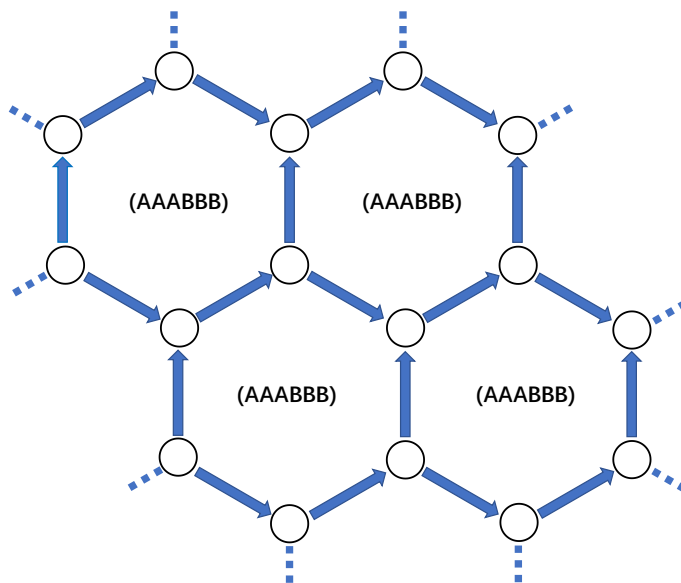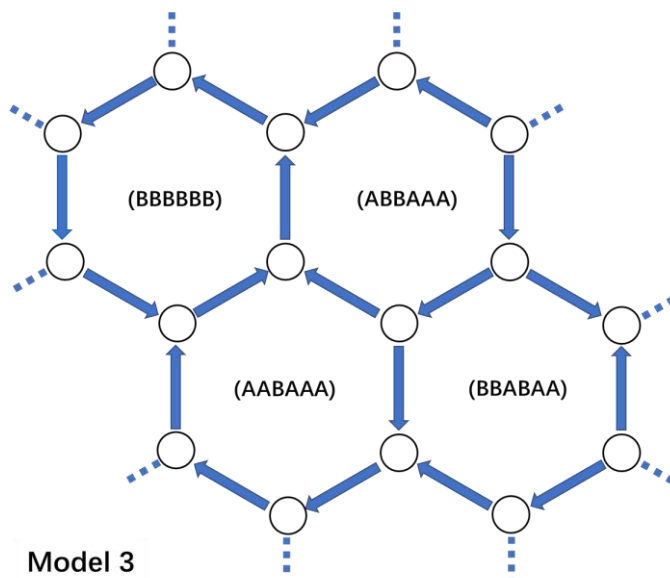

Model 3

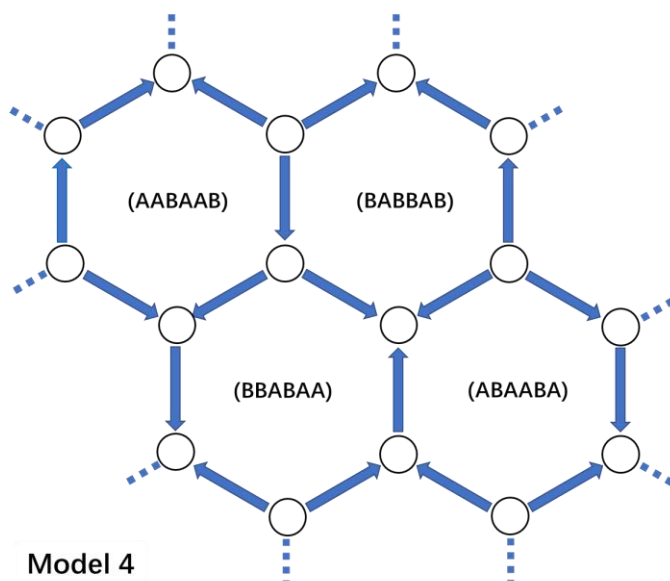

Model 4

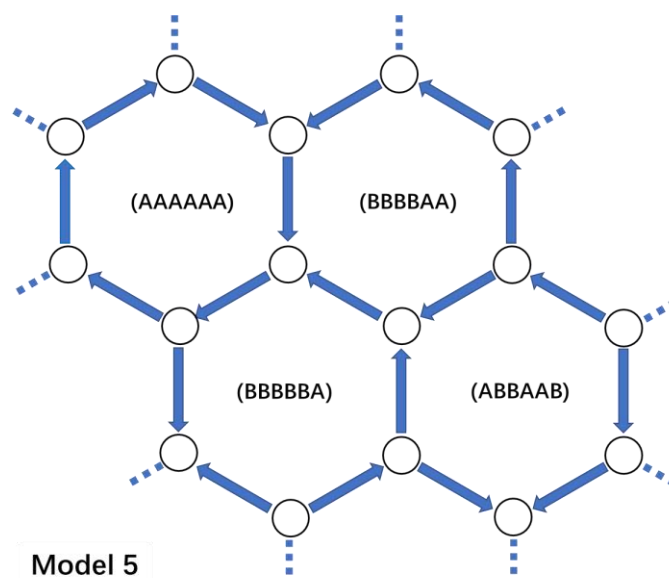

| Model | Cell Type |        |        |        | Space Group | Cell parameters |       |      | Predicted Total energy kcal/mol | Total energy per cell kcal/mol |
|-------|-----------|--------|--------|--------|-------------|-----------------|-------|------|---------------------------------|--------------------------------|
|       | Cell 1    | Cell 2 | Cell 3 | Cell 4 |             | a               | b     | c    |                                 |                                |
| 1     | ABABAB    | ABABAB | ABABAB | ABABAB | P3<br>143   | 68.05           | 68.05 | 3.57 | 463.41                          | 115.85                         |
| 2     | AAABBB    | AAABBB | AAABBB | AAABBB | PM 6        | 69.32           | 69.27 | 3.44 | 580.12                          | 145.03                         |
| 3     | BBBBBB    | ABBAAA | AABAAA | BBABAA | PM 6        | 69.20           | 69.26 | 3.44 | 580.83                          | 145.21                         |
| 4     | AABAAB    | BABBAB | BBABBA | ABAABA | PM 6        | 69.00           | 69.36 | 3.44 | 575.27                          | 143.82                         |
| 5     | AAAAAA    | BBBBAA | BBBBBA | ABBAAB | PM 6        | 69.22           | 69.31 | 3.44 | 580.74                          | 145.19                         |

The predicted total energy of the other four types of conformations listed in the table is significantly greater than that of Model 1. For these models, the model used in the manuscript (Model 1) that has the lowest energy per cell. Although only five possible conformations are listed, it can be speculated from the table that the predicted total energy of Model 1 is the lowest among all possible conformations: Models 1 and 2 contain only one type of cell, while the other models (including those not listed in the table) contain at least four types of cells. Among these cells, only the cell of model 1 has the lowest energy, so it is only possible that the total energy of model 1 is the lowest. From another point of view, we can also obtain this conclusion: For every knot of Tp-ABA-Pa-1 COF, each knot has three connecting arms in three directions, and only when the types of connecting arms in these three directions are the same, the force on the knot is uniform. It can also be seen from the above structural diagram that only each knot of Model 1 has the most uniform stress.

Since Model 1 has the lowest total energy, that is to say, except the Model 1, all the other models are more thermodynamically unstable, so the products should tend to form the conformation with the lowest energy. It is worth noting that this conformation (Model 1) has the best symmetry among all possible conformations.

## Section S11 Atomic coordinates of COFs

| Tp-ABA-Pa-1, Pawley refined                           |      | <i>P3</i> (143) |         |         |
|-------------------------------------------------------|------|-----------------|---------|---------|
| $a = b = 30.1271 \text{ \AA}; c = 3.1283 \text{ \AA}$ |      |                 |         |         |
| $\alpha = \beta = 90^\circ; \gamma = 120^\circ$       |      |                 |         |         |
| Atom Name                                             | Atom | x               | y       | z       |
| C1                                                    | C    | 0.64904         | 0.28359 | 0.51309 |
| C2                                                    | C    | 0.51747         | 0.53212 | 0.47595 |
| H3                                                    | H    | 0.55288         | 0.55642 | 0.42396 |
| C4                                                    | C    | 0.42225         | 0.5803  | 0.4561  |
| C5                                                    | C    | 0.40808         | 0.53532 | 0.56047 |
| C6                                                    | C    | 0.43862         | 0.5192  | 0.56356 |
| C7                                                    | C    | 0.48427         | 0.54795 | 0.46448 |
| C8                                                    | C    | 0.49854         | 0.59277 | 0.35697 |
| C9                                                    | C    | 0.46786         | 0.60875 | 0.34875 |
| C10                                                   | C    | 0.29922         | 0.68096 | 0.24388 |
| N11                                                   | N    | 0.38957         | 0.5955  | 0.46036 |
| O12                                                   | O    | 0.42056         | 0.72786 | 0.14879 |
| C13                                                   | C    | 0.39995         | 0.64099 | 0.3715  |
| H14                                                   | H    | 0.4266          | 0.48445 | 0.64874 |
| H15                                                   | H    | 0.5335          | 0.6154  | 0.27584 |
| H16                                                   | H    | 0.48033         | 0.64319 | 0.25576 |
| H17                                                   | H    | 0.43478         | 0.66804 | 0.39506 |
| H18                                                   | H    | 0.48735         | 0.86053 | 0.64218 |
| C19                                                   | C    | 0.28429         | 0.63205 | 0.29055 |
| C20                                                   | C    | 0.61756         | 0.30169 | 0.46836 |
| C21                                                   | C    | 0.53387         | 0.47092 | 0.56411 |
| C22                                                   | C    | 0.57938         | 0.49699 | 0.67957 |
| C23                                                   | C    | 0.60647         | 0.47701 | 0.71286 |
| C24                                                   | C    | 0.5889          | 0.4308  | 0.63138 |
| C25                                                   | C    | 0.54331         | 0.40489 | 0.51432 |
| C26                                                   | C    | 0.51608         | 0.42479 | 0.48669 |
| N27                                                   | N    | 0.61813         | 0.41167 | 0.67022 |
| C28                                                   | C    | 0.60467         | 0.36521 | 0.58754 |
| O29                                                   | O    | 0.57813         | 0.27654 | 0.37651 |
| H30                                                   | H    | 0.59383         | 0.53239 | 0.75391 |
| H31                                                   | H    | 0.52822         | 0.36945 | 0.44195 |
| H32                                                   | H    | 0.48103         | 0.40429 | 0.39886 |
| H33                                                   | H    | 0.5691          | 0.33999 | 0.60839 |
| H34                                                   | H    | 0.50236         | 0.14367 | 0.80525 |
| N35                                                   | N    | 0.5044          | 0.48966 | 0.53617 |
| H36                                                   | H    | 0.35743         | 0.57273 | 0.56607 |
| H37                                                   | H    | 0.65001         | 0.43242 | 0.79023 |

---

Tp-ABA-Pa-2, Pawley refined

*P*3 (143)

$a = b = 30.5675 \text{ \AA}; c = 3.7218 \text{ \AA}$

$\alpha = \beta = 90^\circ; \gamma = 120^\circ$

---

| Atom Name | Atom | x       | y       | z       |
|-----------|------|---------|---------|---------|
| C1        | C    | 0.64733 | 0.2825  | 0.26874 |
| C2        | C    | 0.5188  | 0.5317  | 0.62377 |
| H3        | H    | 0.55282 | 0.55222 | 0.73716 |
| C4        | C    | 0.42114 | 0.57814 | 0.77745 |
| C5        | C    | 0.40738 | 0.5354  | 0.61525 |
| C6        | C    | 0.43874 | 0.51983 | 0.56688 |
| C7        | C    | 0.4847  | 0.54679 | 0.68086 |
| C8        | C    | 0.49839 | 0.58909 | 0.84917 |
| C9        | C    | 0.46693 | 0.60456 | 0.89965 |
| C10       | C    | 0.29923 | 0.68191 | 1.05598 |
| N11       | N    | 0.38781 | 0.59311 | 0.81932 |
| O12       | O    | 0.42213 | 0.7278  | 1.1495  |
| C13       | C    | 0.39962 | 0.63929 | 0.91847 |
| H14       | H    | 0.42708 | 0.48695 | 0.43703 |
| H15       | H    | 0.53348 | 0.61014 | 0.94369 |
| H16       | H    | 0.47866 | 0.63675 | 1.0389  |
| H17       | H    | 0.43523 | 0.66641 | 0.89272 |
| H18       | H    | 0.48576 | 0.85803 | 0.52174 |
| C19       | C    | 0.28338 | 0.63208 | 1.00864 |
| C20       | C    | 0.61648 | 0.3023  | 0.30986 |
| C21       | C    | 0.53705 | 0.47556 | 0.35995 |
| C22       | C    | 0.58534 | 0.50142 | 0.40085 |
| C23       | C    | 0.61327 | 0.48238 | 0.31822 |
| C24       | C    | 0.59278 | 0.43658 | 0.19247 |
| C25       | C    | 0.54487 | 0.41155 | 0.13709 |
| C26       | C    | 0.51693 | 0.43045 | 0.22054 |
| N27       | N    | 0.62071 | 0.41589 | 0.12108 |
| C28       | C    | 0.60574 | 0.36857 | 0.20705 |
| O29       | O    | 0.57622 | 0.27763 | 0.39657 |
| H30       | H    | 0.6018  | 0.53668 | 0.49314 |
| H31       | H    | 0.52895 | 0.37724 | 0.02399 |
| C32       | C    | 0.46572 | 0.40137 | 0.15709 |
| H33       | H    | 0.56904 | 0.34428 | 0.21259 |
| C34       | C    | 0.48905 | 0.15372 | 0.37275 |
| N35       | N    | 0.50778 | 0.4944  | 0.44449 |
| H36       | H    | 0.35431 | 0.5704  | 0.73235 |
| H37       | H    | 0.6532  | 0.43646 | 0.0086  |
| H38       | H    | 0.45216 | 0.36744 | 0.29073 |
| H39       | H    | 0.45905 | 0.39511 | -0.1296 |

|                                                       |      |                 |         |         |
|-------------------------------------------------------|------|-----------------|---------|---------|
| H40                                                   | H    | 0.44605         | 0.41775 | 0.25505 |
| H41                                                   | H    | 0.45579         | 0.13035 | 0.50654 |
| H42                                                   | H    | 0.4811          | 0.16384 | 0.11468 |
| H43                                                   | H    | 0.50828         | 0.18514 | 0.53735 |
| <hr/>                                                 |      |                 |         |         |
| Tp-ABA-TAPT, Pawley refined                           |      | <i>P3</i> (143) |         |         |
| $a = b = 29.5382 \text{ \AA}; c = 3.5322 \text{ \AA}$ |      |                 |         |         |
| $\alpha = \beta = 90^\circ; \gamma = 120^\circ$       |      |                 |         |         |
| Atom Name                                             | Atom | x               | y       | z       |
| C1                                                    | C    | 0.64226         | 0.28103 | 1.37824 |
| C2                                                    | C    | 0.53417         | 0.50596 | 1.298   |
| C3                                                    | C    | 0.43042         | 0.56508 | 0.36435 |
| C4                                                    | C    | 0.41359         | 0.51371 | 0.45891 |
| C5                                                    | C    | 0.44688         | 0.49405 | 0.43618 |
| C6                                                    | C    | 0.49802         | 0.52559 | 0.31977 |
| C7                                                    | C    | 0.51493         | 0.5768  | 0.22222 |
| C8                                                    | C    | 0.48149         | 0.59636 | 0.2411  |
| C9                                                    | C    | 0.29548         | 0.68384 | 0.19053 |
| C10                                                   | C    | 1.27759         | 1.62825 | 0.23567 |
| N11                                                   | N    | 1.61476         | 1.30565 | 0.37821 |
| C12                                                   | C    | 1.55053         | 1.4347  | 0.37523 |
| C13                                                   | C    | 1.60455         | 1.46323 | 0.37981 |
| C14                                                   | C    | 1.63312         | 1.43819 | 0.37993 |
| C15                                                   | C    | 1.60845         | 1.38427 | 0.37823 |
| C16                                                   | C    | 1.5545          | 1.35599 | 0.37854 |
| C17                                                   | C    | 1.52599         | 1.38107 | 0.37866 |
| H18                                                   | H    | 1.67461         | 1.46119 | 0.38345 |
| H19                                                   | H    | 1.53418         | 1.31443 | 0.37912 |
| H20                                                   | H    | 1.48447         | 1.35859 | 0.37956 |
| N21                                                   | N    | 1.51921         | 1.45837 | 0.37925 |
| H22                                                   | H    | 1.62506         | 1.50467 | 0.3899  |
| C23                                                   | C    | 1.40737         | 1.63561 | 0.31115 |
| N24                                                   | N    | 1.39476         | 1.58375 | 0.39425 |
| O25                                                   | O    | 1.30205         | 1.56743 | 0.09782 |
| H26                                                   | H    | 1.44706         | 1.6656  | 0.33312 |
| H27                                                   | H    | 1.35891         | 1.55876 | 0.51232 |
| H28                                                   | H    | 0.57305         | 0.53186 | 1.2051  |
| H29                                                   | H    | 0.37447         | 0.48876 | 0.5525  |
| H30                                                   | H    | 0.43267         | 0.45433 | 0.51311 |
| H31                                                   | H    | 0.55405         | 0.60167 | 0.12787 |
| H32                                                   | H    | 0.49608         | 0.6357  | 0.15531 |

| Tp-ABA-TAPB, Pawley refined                           |      | <i>P3</i> (143) |         |          |
|-------------------------------------------------------|------|-----------------|---------|----------|
| $a = b = 29.5272 \text{ \AA}; c = 3.6081 \text{ \AA}$ |      |                 |         |          |
| $\alpha = \beta = 90^\circ; \gamma = 120^\circ$       |      |                 |         |          |
| Atom Name                                             | Atom | x               | y       | z        |
| C1                                                    | C    | 0.64184         | 0.27904 | 1.39844  |
| C2                                                    | C    | 0.53097         | 0.50603 | 1.42229  |
| C3                                                    | C    | 0.42582         | 0.56271 | 0.33184  |
| C4                                                    | C    | 0.40861         | 0.51049 | 0.2778   |
| C5                                                    | C    | 0.44246         | 0.49166 | 0.30664  |
| C6                                                    | C    | 0.4943          | 0.52483 | 0.39376  |
| C7                                                    | C    | 0.51139         | 0.57689 | 0.45501  |
| C8                                                    | C    | 0.47751         | 0.59572 | 0.42613  |
| C9                                                    | C    | 0.29718         | 0.68575 | 0.0606   |
| C10                                                   | C    | 1.27735         | 1.62996 | 0.10892  |
| C11                                                   | C    | 1.61325         | 1.30434 | 0.39874  |
| C12                                                   | C    | 1.54753         | 1.43452 | 0.3814   |
| C13                                                   | C    | 1.59723         | 1.45915 | 0.5333   |
| C14                                                   | C    | 1.62579         | 1.43422 | 0.54347  |
| C15                                                   | C    | 1.60606         | 1.38446 | 0.39542  |
| C16                                                   | C    | 1.55614         | 1.36024 | 0.24423  |
| C17                                                   | C    | 1.52718         | 1.38473 | 0.24335  |
| H18                                                   | H    | 1.66277         | 1.45379 | 0.67891  |
| H19                                                   | H    | 1.53953         | 1.32292 | 0.11469  |
| H20                                                   | H    | 1.48905         | 1.3653  | 0.1241   |
| N21                                                   | N    | 1.51616         | 1.45802 | 0.36499  |
| H22                                                   | H    | 1.61383         | 1.49684 | 0.65609  |
| C23                                                   | C    | 1.40417         | 1.63212 | 0.19141  |
| N24                                                   | N    | 1.3898          | 1.58062 | 0.29957  |
| O25                                                   | O    | 1.29875         | 1.56738 | -0.03965 |
| H26                                                   | H    | 1.4444          | 1.66076 | 0.1919   |
| H27                                                   | H    | 1.35176         | 1.5542  | 0.36295  |
| H28                                                   | H    | 0.57057         | 0.53344 | 1.48333  |
| H29                                                   | H    | 0.36887         | 0.48437 | 0.20831  |
| H30                                                   | H    | 0.42806         | 0.45124 | 0.25911  |
| H31                                                   | H    | 0.55101         | 0.60303 | 0.52798  |
| H32                                                   | H    | 0.49185         | 0.63574 | 0.48661  |
| H33                                                   | H    | 1.57202         | 1.28197 | 0.39842  |

## Section S12 References

- [1] Kandambeth, S.; Mallick, A.; Lukose, B.; Mane, M. V.; Heine, T.; Banerjee, R. Construction of Crystalline 2D Covalent Organic Frame-works with Remarkable Chemical (Acid/Base) Stability via a Combined Reversible and Irreversible Route. *J. Am. Chem. Soc.* 2012, *134*, 19524-19527.
